# Supplementary material for: Synergistic and antagonistic drug interactions in the treatment of systemic fungal infections
Source: eLife. 2020 May 5;9:e54160. doi: 10.7554/eLife.54160 (PMC7200157; doi:10.7554/eLife.54160)
Supplement: Figure 2—source data 1. — FICI scores for small molecules listed in combination with fluconazole. All scores are for FICI 90% inhibition unless listed. *=FICI scores for 50% inhibition (when 90% inhibition of fungal growth could not be obtained. [file elife-54160-fig2-data1.xlsx]

## Sheet: Sheet1
small molecule name	3',4'-Dihydroxyflavone*	Chloroxine*	Bismuth Subsalicylate*	Dapsone*	Xylometazoline Hydrochloride*	Sertraline Hydrochloride	3-Amino-beta-Pinene*	Primaquine Diphosphate*	Safrole	Fluocinolone Acetonide*	Tolfenamic Acid*	Dihydromyristicin	4'-Methoxychalcone*	Estriol*	Dicyclomine Hydrochloride	Blasticidin S*	Benzalkonium Chloride	Cadaverine Tartrate*	Clomipramine Hydrochloride	Octopamine Hydrochloride*	Toremiphene Citrate	Heptaminol Hydrochloride*	Glyburide	Tanshinone IIA Sulfonate Sodium*	3,4'-Dihydroxyflavone	Dehydroepiandrosterone*	Diallyl Sulfide*	Epiandrosterone*	Gossypetin*	Tulobuterol*	Chloroguanide Hydrochloride	Linalool*	Mebeverine Hydrochloride	Desipramine Hydrochloride	Amiodarone Hydrochloride	Berbamine Hydrochloride	Bromhexine Hydrochloride	Diphenhydramine Hydrochloride*	Hexetidine	Metergoline*
FICI score, replicate #1	0.1875	0.1875	0.078125	0.1875	0.2519	0.1875	0.3125	0.126953	0.3125	0.375	0.265625	0.28125	0.5	0.375	0.3125	0.375	0.375	0.375	0.375	0.375	0.375	0.25195	0.5	0.28125	0.75	0.3125	0.5	0.5	0.3125	0.3125	0.5	0.375	0.375	0.5	0.5	0.5	0.5	0.5	0.5	0.5
FICI score, replicate #2	0.125	0.15625	0.3125	0.25	0.1875	0.28125	0.1875	0.375	0.3125	0.2578	0.375	0.375	0.1875	0.318	0.25	0.3125	0.375	0.375	0.375	0.375	0.375	0.5	0.28125	0.5	0.3125	0.5	0.3125	0.3125	0.5	0.5	0.375	0.5	0.5	0.5	0.5	0.5	0.5	0.5	0.5	0.5
FICI score, replicate #3															0.325	0.375									0.125									0.5	0.5
FICI score, replicate #4															0.5																			0.375
FICI score, replicate #5															0.375
