# Supplementary material for: Synergistic and antagonistic drug interactions in the treatment of systemic fungal infections
Source: eLife. 2020 May 5;9:e54160. doi: 10.7554/eLife.54160 (PMC7200157; doi:10.7554/eLife.54160)
Supplement: Figure 2—source data 2. — FICI scores for small molecules listed in combination with fluconazole. All scores are for FICI 90% inhibition unless listed. *=FICI scores for 50% inhibition (when 90% inhibition of fungal growth could not be obtained. [file elife-54160-fig2-data2.xlsx]

## Sheet: Sheet1
small molecule name	Ribostamycin Sulfate*	Bergapten*	Disulfiram*	Scopoletin*	Phenylbutyric Acid*	Carbimazole	Ethacrynic Acid*	Guaiazulene*	Anthracene-9-Carboxylic Acid	Ivermectin*	Eugenol	Berberine Chloride*	Nerol	Piplartine*	Nafcillin Sodium*	Osthol*	Celestrol*	Lapachol*	Rotenone
FICI score replicate #1	4.25	5	5	4.5	5	6	5	5	6	3	4	6	10	6	8.5	14	132	132	258
FICI score replicate #2	4.25	4	3	5	5	4.5	0.375	6	5	10	9	8.5	4	10	8	6	8.5	132	34
FICI score replicate #3			6			5	10			5		5
FICI score replicate #4						5
