# Supplementary material for: Synergistic and antagonistic drug interactions in the treatment of systemic fungal infections
Source: eLife. 2020 May 5;9:e54160. doi: 10.7554/eLife.54160 (PMC7200157; doi:10.7554/eLife.54160)
Supplement: Figure 2—source data 3. — FICI scores for small molecules listed in combination with fluconazole. All scores are for FICI 90% inhibition unless listed. *=FICI scores for 50% inhibition (when 90%) inhibition of fungal growth could not be obtained. [file elife-54160-fig2-data3.xlsx]

## Sheet: Sheet1
Bliss Independence Assay, small molecule concentration at 10 micromolar
small molecule name	1-Methylxanthine	1-Phenylbiguanide hydrochloride	21-Acetoxypregnenolone	5,7-Dichlorokynurenic Acid	7,8-Dihydroxyflavone	8-Cyclopentyltheophylline	Acadesine	Aliskiren Hemifumarate	Allopurinol	Aminohydroxybutyric Acid	Amprolium	Andrographolide	Apiin	Bambuterol Hydrochloride	Betulin	Bucladesine	Citrulline	Cytisine	Decoquinate	Digitoxin	Dimethylsulfone	Dopamine Hydrochloride	Embelin	Ergosterol	Glucosaminic Acid	Guaiol	Harmalol Hydrochloride	Hecogenin	Huperzine A	Hydrocortisone Hemisuccinate	Hydrocortisone Phosphate Triethylamine	Lappaconitine	L-Deoxyalliin	Levalbuterol Hydrochloride	Mangiferin	Melezitose	Metformin Hydrochloride	Morin	Oxolinic Acid	Pamabrom	Phloridzin	Picropodophyllotoxin	Putrescine Dihydrochloride	Pyrithyldione	Quebrachitol	Resveratrol	Risedronate Sodium Hydrate	Salsolidine	Spermidine Trihydrochloride
replicate #1	0.226	0.265	0.341	0.223	-0.11	0.252	0.287	0.092	0.119	0.279	0.133	0.346	0.163	0.244	0.183	0.293	0.202	-0.151	0.468	-0.0863	-0.0953	0.0772	-0.186	-0.216	-0.054	0.282	-0.101	0.0062	0.183	0.123	0.327	-0.239	0.175	-0.113	0.189	-0.0376	-0.0534	-0.192	0.1	0.462	0.218	0.134	-0.237	0.136	0.198	0.13	0.169	-0.328	0.199
replicate #2	0.225	0.305	0.0977	0.344	0.435	0.182	0.136	0.201	0.492	0.381	0.29	0.189	0.127	0.107	0.236	-0.00989	0.291	-0.147	0.243	-0.0176	0.00051	0.0842	0.068	0.268	0.3	0.173	0.0331	0.164	0.211	0.193	0.114	0.0534	0.223	0.309	0.228	0.213	0.123	0.177	-0.0203	0.125	0.273	0.193	0.271	0.257	0.147	0.0435	0.202	0.0114	0.137
replicate #3	0.036	0.32	0.237		0.351			0.024								-0.712		-0.717	0.49	-0.907	-0.772		-0.755	0.376	0.28		-0.721	0.272		-0.0938	0.246	-0.674	0.205	0.292		0.183	-0.599	0.28	-0.589				0.243				-0.114	-0.744
Bliss Independence Assay, small molecule concentration at 100 nanomolar
small molecule name	1-Methylxanthine	1-Phenylbiguanide hydrochloride	21-Acetoxypregnenolone	5,7-Dichlorokynurenic Acid	7,8-Dihydroxyflavone	8-Cyclopentyltheophylline	Acadesine	Aliskiren Hemifumarate	Allopurinol	Aminohydroxybutyric Acid	Amprolium	Andrographolide	Apiin	Bambuterol Hydrochloride	Betulin	Bucladesine	Citrulline	Cytisine	Decoquinate	Digitoxin	Dimethylsulfone	Dopamine Hydrochloride	Embelin	Ergosterol	Glucosaminic Acid	Guaiol	Harmalol Hydrochloride	Hecogenin	Huperzine A	Hydrocortisone Hemisuccinate	Hydrocortisone Phosphate Triethylamine	Lappaconitine	L-Deoxyalliin	Levalbuterol Hydrochloride	Mangiferin	Melezitose	Metformin Hydrochloride	Morin	Oxolinic Acid	Pamabrom	Phloridzin	Picropodophyllotoxin	Putrescine Dihydrochloride	Pyrithyldione	Quebrachitol	Resveratrol	Risedronate Sodium Hydrate	Salsolidine	Spermidine Trihydrochloride
replicate #1	0.132	0.0924	0.0341	0.0166	-0.307	-0.174	-0.191	-0.0635	0.0934	0.137	0.0192	0.156	0.106	0.0442	-0.0129	0.36	-0.365	-0.02	0.147	0.00966	0.0267	0.0442	0.0154	-0.234	-0.12	-0.139	-0.00295	-0.369	0.0772	0.035	0.0748	0.156	0.186	-0.211	-0.231	-0.252	0.0947	0.14	-0.0339	0.143	-0.413	0.187	0.238	0.115	0.172	-0.0131	0.054	0.128	0.203
replicate #2	-0.285	0.141	0.202	0.0955	0.37	0.148	0.216	0.0933	0.149	0.0243	0.224	0.121	0.0496	0.029	0.132	0.0937	0.249	0.146	0.228	-0.0226	0.0516	-0.0149	0.108	0.206	0.246	0.0685	0.0756	0.162	0.0548	0.185	0.164	-0.0013	0.124	0.202	0.315	0.189	0.138	0.14	0.00322	0.0313	0.343	0.168	0.218	0.106	0.014	-0.0013	0.176	0.0534	0.011
replicate #3	-0.117	-0.0326	0.0155		0.126	0.179	0.03	-0.074			0.0538				0.0911		0.37	-0.682	-0.0212	-0.901		-0.862		0.0998	0.275	0.113	-0.623	0.324		-0.0604	-0.064	-0.814	0.0277	0.155	-0.0256	0.251			-0.838		-0.186					-0.753
replicate #4
replicate #5
replicate #6
replicate #7
[truncated: 8 more columns]
