# Supplementary material for: Synergistic and antagonistic drug interactions in the treatment of systemic fungal infections
Source: eLife. 2020 May 5;9:e54160. doi: 10.7554/eLife.54160 (PMC7200157; doi:10.7554/eLife.54160)
Supplement: Figure 2—source data 4. — FICI scores for small molecules listed in combination with fluconazole. All scores are for FICI 90% inhibition unless listed. *=FICI scores for 50% inhibition (when 90% inhibition of fungal growth could not be obtained. [file elife-54160-fig2-data4.xlsx]

## Sheet: Sheet1
small molecule name	Aconitic Acid	Gentisic Acid	Acamprosate Calcium*	Daunorubicin	Harmane	3-Bromo-7-Nitroindazole	Colistin Sulfate	Usnic Acid*	Pectolinarin	Succinylacetone	Larixinic Acid	Acetyltryptophan*	Ketoconazole	Methimazole	3-Amino-1,2,4-Triazole	Hypoxanthine	Cholic Acid	N-Methylanthranilic Acid	Fludrocortisone Acetate*	Phenacylamine Hydrochloride*	Dihydroergotamine Mesylate	Cresol	Sulfamethizole	Estrone	1-Monopalmitin*	Ancitabine Hydrochloride*	Bleomycin	Gallamine Triethiodide*	Betonicine	Dexpanthenol*	Orsellinic Acid	beta-Escin*	Vindoline	Biochanin A*	Cortisone	Tyramine	3,4-Dimethoxycinnamic Acid	L-Alliin*	Caryophyllene*	Rabeprazole Sodium*	Adrenaline Bitartrate*	Convallatoxin*	Nonoxynol-9*	Ursocholanic Acid	Artenimol*	Hexylresorcinol	2-Methoxyresorcinol	Astaxanthin	Dihydrojasmonic Acid
replicate #1	0.5625	0.5625	0.625	0.501	0.625	0.625	0.625	0.5625	0.75	0.75	0.75	0.75	0.75	0.75	1	0.53125	0.515625	0.75	1	0.75	1	1	1	1.5	0.5009	0.5625	2.25	2.5	2	1.5	0.5625	2	2	0.625	0.625	2	0.75	2	0.75	0.625	1	2	2.5	2	0.625	1.25	0.5039	3	3
replicate #2	0.53125	0.53125	0.500978	0.625	0.5625	0.5625	0.5625	0.625	0.5625	0.75	0.75	0.75	0.75	0.75	0.53125	1	1	0.75	0.75	1	0.75	1	1	0.515	0.625	2	0.75	0.5009	0.53	2	2	0.5625	0.5625	2	2	0.625	2	0.75	2	0.625	2	1	0.503906	1	2.5	2	3	0.515625	0.625
replicate #3										0.53125	0.625							1			1	1			2	0.1875	0.75	0.5009		0.3125										3					0.625
replicate #4																											0.75																		2.5
[truncated: 21 more columns]
