# Supplementary material for: Synergistic and antagonistic drug interactions in the treatment of systemic fungal infections
Source: eLife. 2020 May 5;9:e54160. doi: 10.7554/eLife.54160 (PMC7200157; doi:10.7554/eLife.54160)
Supplement: Figure 3—source data 1. — FICI scores for small molecules listed in combination with fluconazole. All scores are for FICI 90% inhibition unless listed. *=FICI scores for 50% inhibition (when 90% inhibition of fungal growth could not be obtained. [file elife-54160-fig3-data1.xlsx]

## Sheet: Sheet1
small molecule name	Proadifen	Drofenine	Naftidrofuryl*	Lofepramine	Mianserine	Impramine	Sibutramine	Citaopram
replicate #1	0.5	0.25	0.375	0.5156	0.5	0.375	0.375	0.625
replicate #2	0.5	0.1875	0.5	1	0.375	0.5	0.375	0.625
