# Supplementary material for: Synergistic and antagonistic drug interactions in the treatment of systemic fungal infections
Source: eLife. 2020 May 5;9:e54160. doi: 10.7554/eLife.54160 (PMC7200157; doi:10.7554/eLife.54160)
Supplement: Figure 4—source data 1. — FICI scores for small molecules listed in combination with fluconazole. Whether FICI scores represent 90% inhibition of 50% inhibition is marked in Figure 4. [file elife-54160-fig4-data1.xlsx]

## Sheet: Sheet1
	strain name	CM18	KN99	MUC 416-4	MUC 402-1	NRHc.5013.ENR	MUC 418-1	Ftc 555-1	NRHc.5027.ENR.CLIN1	Ftc 327-1	MUC 37-1	PMHC.1050.ENR.CLIN1	NRHc.5011.ENR	Cryptococcus gattii	Candida auris AR03	Candida auris AR04	Candida albicans	Candida glabrata
3-amino-beta-pinene	replicate #1	0.1875	0.5	1	1	0.625	0.75	0.625	0.625	8.5	1	0.625	0.625	0.375	0.515625	0.375	2.5	0.5312
	replicate #2	0.3125	0.75	1	0.75	0.625	3	1	0.625	5	2.5	0.625	2	0.28126	0.625	0.5	1	0.625
	replicate #3		1		3		0.5625											1
Benzalkonium HCl	replicate #1	0.375	0.25	0.25	0.375	0.25	0.375	0.25	0.25	0.25	0.5	0.375	0.25	0.5	0.25	0.25	3.5	0.375
	replicate #2	0.375	0.25	0.25	0.3125	0.375	0.3125	0.25	0.375	0.25	0.5	0.3125	0.25	0.5	0.1875	0.5	0.75	0.375
Berbamine HCl	replicate #1	0.5	0.375	0.25	0.3125	0.25	0.3125	0.3125	0.3125	0.375	0.375	0.3125	0.75	0.25	0.25	0.375	0.515	0.15625
	replicate #2	0.5	0.5	0.375	0.28125	0.3125	0.5	0.3125	0.3125	0.3125	0.375	0.3125	0.5625	0.3125	0.375	0.375	0.515	0.1875
Bismuth Subsalicylate	replicate #1	0.078125	3	0.75	10	10	0.75	2	3	9	2	0.75	9	2	0.5	4	0.51	0.625
	replicate #2	0.3125	3	3	10	6	2	0.625	2.5	0.5	3	3	5	2	0.5	8	2	0.75
	replicate #3									2.06							2
	replicate #4																0.625
	replicate #5																0.5
Clomipramine	replicate #1	0.375	0.5	0.5	0.5	0.5	0.5	0.3125	0.5	0.375	0.375	0.375	0.5	0.25	0.375	0.25	0.265625	0.5
	replicate #2	0.375	0.375	0.5	0.375	0.375	0.375	0.5	0.5	0.5	0.5	0.5	0.5	0.25	0.1875	0.1875	0.5	0.5
	replicate #3										0.3125
Dehydroepiandrosterone	replicate #1	0.3125	0.5	0.5	0.252	8	0.503	6	0.265	5	0.25098	0.5	2.25	0.26	2	1	0.75	0.5625
	replicate #2	0.5	0.265	0.5	0.2539	5	2	4	0.265	17	0.375	0.265	1	0.26	3	0.75	0.2812	0.625
	replicate #3				0.25098	10	0.503	6			0.2539					0.75	0.5625
	replicate #4					6
	replicate #5					8
Dicyclomine HCl	replicate #1	0.3125	0.25	0.25	0.375	0.375	0.375	0.375	0.375	0.375	0.375	0.28	0.5	0.25	0.25	0.3125	0.5625	0.75
	replicate #2	0.25	0.25	0.375	0.375	0.3125	0.375	0.5	0.375	0.25	0.375	0.375	0.25	0.125	0.3125	0.3125	0.5625	0.625
	replicate #3	0.325
	replicate #4	0.5
	replicate #5	0.375
Estriol	replicate #1	0.375	0.2539	8.5	16.55	5	4.0625	129	3		3	33	5	0.28	0.5	2.25	0.2812	0.3125
	replicate #2	0.318	0.2537	8.125	5	17	4.25	4.125	0.75		0.75	5	32.5	8.5	0.5	0.531	0.3125	0.75
	replicate #3			8.06125			4.0625	0.515								0.625
Fluocinolone Acetonide	replicate #1	0.375	0.312	0.75	0.625	2	3	0.75	2.5	0.375	0.75	2	2.5	0.531	3	4.5	1	1
	replicate #2	0.2578	0.375	2.5	2.5	0.5625	3	1	3	0.375	3	2	3	2.125	2.0625	0.3125	2	0.625
	replicate #3							2								3
Sertraline HCl	replicate #1	0.1875	0.25	0.1875	0.1875	0.15625	0.28125	0.25	0.25	0.25	0.25	0.25	0.3125	0.25	0.375	0.1875	0.375	0.375
	replicate #2	0.28125	0.25	0.25	0.1875	0.1875	0.375	0.25	0.25	0.25	0.3125	0.25	0.25	0.25	0.375	0.3125	0.1875	0.3125
Xylometazoline HCl	replicate #1	0.2519	0.75				1	2.25	0.75	2	0.625	0.515	1	0.5			0.5625	1
	replicate #2	0.1875	0.75				0.75	0.50094	2.25	1	0.5625	0.75	1	0.5			0.5625	1
Ivermectin	replicate #1	3	3	0.625	2	0.5018	4	0.5625	2	3	3	2.5	3	2.25	2.25	2.25	0.3125	0.375
	replicate #2	10	3	0.75	0.625	8.5	4.125	3	3	3	2	0.75	1	2	0.625	0.625	0.3125	0.5
	replicate #3	5	0.515			0.507											0.28125
Nafcillin sodium	replicate #1	8.5	4	5	9	6.25	9	10	8.5	9	18	10	5	5	0.515	1	5	2
	replicate #2	8	6	5	9	17	5	17	5	5	4.5	6	5	5	2	2	6	1
	replicate #3							4.5						4
