# Supplementary material for: Synergistic and antagonistic drug interactions in the treatment of systemic fungal infections
Source: eLife. 2020 May 5;9:e54160. doi: 10.7554/eLife.54160 (PMC7200157; doi:10.7554/eLife.54160)
Supplement: Figure 4—source data 3. — FICI scores for dicyclomine in combination with fluconazole. All scores are for FICI 90% inhibition unless listed. *=FICI scores for 50% inhibition (when 90% inhibition of fungal growth could not be obtained. [file elife-54160-fig4-data3.xlsx]

## Sheet: Sheet1
Source Data Table 11.
Cry neo 1	Cry neo 2	Cry neo 3	Cry neo 4	Cry neo 5*	Cry neo 7	Cry neo 8	Auris 1*	Auris 2*	Auris 3*
0.25	0.375	0.25	0.375	0.5	0.25	0.1875	0.5	0.25	0.25
0.375	0.3125	0.5	0.09375	0.1875	0.25	0.25	0.12695	0.375	0.5
