# Supplementary material for: Synergistic and antagonistic drug interactions in the treatment of systemic fungal infections
Source: eLife. 2020 May 5;9:e54160. doi: 10.7554/eLife.54160 (PMC7200157; doi:10.7554/eLife.54160)
Supplement: Figure 4—source data 4. — FICI scores for 90% inhibition for dicyclomine in combination with ketoconazole for KN99 C. neoformans. [file elife-54160-fig4-data4.xlsx]

## Sheet: Sheet1
Source Data Table 12.
0.3125
0.25
0.375
