# Supplementary material for: Synergistic and antagonistic drug interactions in the treatment of systemic fungal infections
Source: eLife. 2020 May 5;9:e54160. doi: 10.7554/eLife.54160 (PMC7200157; doi:10.7554/eLife.54160)
Supplement: Figure 5—source data 1. — FICI scores for small molecules listed in combination with fluconazole. All scores are for FICI 90% inhibition unless listed. *=FICI scores for 50% inhibition (when 90% inhibition of fungal growth could not be obtained. [file elife-54160-fig5-data1.xlsx]

## Sheet: Sheet1
small molecule name	Amdinocillin	Amoxicillin	Ampicillin	Azlocillin	Carbenicillin	Oxacillin	Cefoxitin	Aztreonam	Methicillin	Cefonicid	Cefazolin	Vancomycin	Linezolid	Amphotercin B
replicate #1	3	0.75	0.500977	0.75	0.75	4.125	2	2	5	4	4.5	0.2578	3	0.5
replicate #2	0.500977	0.5	0.625	3	3	18	0.75	2	6	4.5	32	1	3	0.5
replicate #3		3										3	5
