# Supplementary material for: Synergistic and antagonistic drug interactions in the treatment of systemic fungal infections
Source: eLife. 2020 May 5;9:e54160. doi: 10.7554/eLife.54160 (PMC7200157; doi:10.7554/eLife.54160)
Supplement: Figure 5—source data 2. — FICI scores for 50% inhibition for nafcillin in combination with amphotericin B for KN99 C. neoformans. [file elife-54160-fig5-data2.xlsx]

## Sheet: Sheet1
Source Data Table 9.
0.5
0.5
