# Supplementary material for: Synergistic and antagonistic drug interactions in the treatment of systemic fungal infections
Source: eLife. 2020 May 5;9:e54160. doi: 10.7554/eLife.54160 (PMC7200157; doi:10.7554/eLife.54160)
Supplement: Figure 6—figure supplement 1—source data 1. — OD600 from each of two different biological replicates. Each biological replicate represents the average of four technical replicates. These data were averaged to produce the graphs in Figure 6—figure supplement 1G–J. [file elife-54160-fig6-figsupp1-data1.xlsx]

## Sheet: Sheet1
Experimental conditions: no drugs (vehicle control)						Experimental conditions: fluconazole alone						Experimental conditions: dicyclomine alone						Experimental conditions: fluconazole and dicyclomine combined
Time (hh:mm:ss)	Vehicle		0.4 mg/mL 5-MT			Time (hh:mm:ss)	Vehicle		0.4 mg/mL 5-MT			Time (hh:mm:ss)	Vehicle		0.4 mg/mL 5-MT			Time (hh:mm:ss)	Vehicle		0.4 mg/mL 5-MT
0:01:26	0.06475	0.0725	0.068	0.0615		0:01:26	0.06625	0.08625	0.07425	0.06525		0:01:26	0.06425	0.08	0.071	0.06375		0:01:26	0.06475	0.08275	0.0785	0.06475
0:30:06	0.06	0.06075	0.0615	0.06025		0:30:06	0.05975	0.0605	0.06125	0.062		0:30:06	0.0595	0.0605	0.05925	0.06075		0:30:06	0.0595	0.0605	0.06325	0.06175
1:00:06	0.05975	0.06125	0.06125	0.06		1:00:06	0.0595	0.06075	0.0615	0.06175		1:00:06	0.059	0.0605	0.05975	0.06025		1:00:06	0.05925	0.0605	0.06375	0.06125
1:30:06	0.06025	0.06075	0.0605	0.06		1:30:06	0.05975	0.06075	0.06075	0.0615		1:30:06	0.05975	0.0605	0.05925	0.06025		1:30:06	0.05975	0.0605	0.063	0.06125
2:00:06	0.06	0.061	0.06075	0.06		2:00:06	0.0595	0.06075	0.0615	0.06175		2:00:06	0.0595	0.06	0.05925	0.06025		2:00:06	0.05925	0.0605	0.06375	0.061
2:30:06	0.05975	0.05975	0.0605	0.06		2:30:06	0.0595	0.059	0.05925	0.0615		2:30:06	0.0595	0.05975	0.05825	0.06		2:30:06	0.05925	0.059	0.061	0.06075
3:00:06	0.06025	0.06175	0.06025	0.06025		3:00:06	0.0595	0.06125	0.06075	0.0615		3:00:06	0.0595	0.06175	0.059	0.06		3:00:06	0.05975	0.06225	0.06275	0.061
3:30:06	0.06	0.06175	0.06125	0.06		3:30:06	0.0595	0.06	0.06075	0.0615		3:30:06	0.0595	0.06	0.06	0.05975		3:30:06	0.05925	0.06075	0.063	0.06075
4:00:06	0.0605	0.05925	0.06075	0.06		4:00:06	0.0605	0.057	0.0595	0.0615		4:00:06	0.0595	0.05775	0.05925	0.05975		4:00:06	0.05925	0.05825	0.061	0.06075
4:30:06	0.06025	0.063	0.06275	0.06		4:30:06	0.06	0.0615	0.06525	0.06125		4:30:06	0.0595	0.06325	0.06325	0.06		4:30:06	0.05925	0.0605	0.0675	0.061
5:00:06	0.061	0.062	0.06275	0.0605		5:00:06	0.06025	0.0585	0.062	0.062		5:00:06	0.05975	0.06075	0.061	0.06		5:00:06	0.05925	0.05975	0.064	0.061
5:30:06	0.0615	0.06225	0.0615	0.06025		5:30:06	0.0605	0.0615	0.06375	0.06225		5:30:06	0.06025	0.061	0.06075	0.06		5:30:06	0.06	0.0615	0.065	0.06125
6:00:06	0.06125	0.0575	0.06125	0.061		6:00:06	0.0605	0.05475	0.05825	0.062		6:00:06	0.06025	0.05525	0.05875	0.06025		6:00:06	0.06	0.05525	0.05975	0.0615
6:30:06	0.062	0.0645	0.0635	0.06075		6:30:06	0.06125	0.062	0.06775	0.062		6:30:06	0.06075	0.065	0.0635	0.06		6:30:06	0.06	0.06725	0.06925	0.061
7:00:06	0.062	0.0615	0.06125	0.061		7:00:06	0.0615	0.06	0.06125	0.0625		7:00:06	0.0605	0.06075	0.05975	0.06025		7:00:06	0.06	0.06	0.063	0.06175
7:30:06	0.062	0.06225	0.0615	0.06125		7:30:06	0.06125	0.061	0.062	0.06275		7:30:06	0.0605	0.06075	0.06	0.06025		7:30:06	0.059	0.06	0.0635	0.06175
8:00:06	0.0635	0.06375	0.0615	0.06125		8:00:06	0.0625	0.06	0.06225	0.06275		8:00:06	0.062	0.065	0.05975	0.0605		8:00:06	0.061	0.05975	0.0625	0.06175
8:30:06	0.06325	0.06175	0.0625	0.06175		8:30:06	0.06275	0.064	0.0585	0.06275		8:30:06	0.0615	0.06025	0.0605	0.061		8:30:06	0.06	0.058	0.063	0.062
9:00:06	0.063	0.066	0.063	0.062		9:00:06	0.06175	0.06725	0.06475	0.06325		9:00:06	0.0595	0.06775	0.0605	0.061		9:00:06	0.05825	0.06525	0.06575	0.062
9:30:06	0.06575	0.06775	0.062	0.06225		9:30:06	0.0655	0.0635	0.06225	0.063		9:30:06	0.063	0.0645	0.06	0.06125		9:30:06	0.0615	0.06475	0.0635	0.062
10:00:06	0.06625	0.063	0.0625	0.06275		10:00:06	0.06525	0.05925	0.062	0.06425		10:00:06	0.06275	0.0625	0.0605	0.06175		10:00:06	0.0605	0.058	0.063	0.06275
10:30:06	0.06775	0.0655	0.06175	0.06275		10:30:06	0.0655	0.065	0.0635	0.06375		10:30:06	0.06375	0.064	0.06	0.06175		10:30:06	0.061	0.061	0.06475	0.06275
11:00:06	0.07	0.06575	0.06175	0.0635		11:00:06	0.07025	0.0605	0.06075	0.06475		11:00:06	0.06425	0.0645	0.061	0.06225		11:00:06	0.06225	0.06875	0.0635	0.063
11:30:06	0.072	0.0675	0.0635	0.0645		11:30:06	0.0695	0.0645	0.06375	0.0655		11:30:06	0.06475	0.06525	0.06175	0.063		11:30:06	0.0605	0.06125	0.06425	0.06375
12:00:06	0.0745	0.07	0.0645	0.065		12:00:06	0.0725	0.066	0.0645	0.066		12:00:06	0.067	0.06675	0.062	0.06325		12:00:06	0.06125	0.0615	0.0645	0.06375
12:30:06	0.0785	0.07175	0.06475	0.0655		12:30:06	0.0775	0.06775	0.0645	0.06675		12:30:06	0.06925	0.068	0.06225	0.064		12:30:06	0.06275	0.06175	0.06425	0.0645
13:00:06	0.0815	0.07425	0.0665	0.0665		13:00:06	0.07875	0.07	0.0665	0.06725		13:00:06	0.0695	0.071	0.06375	0.06475		13:00:06	0.061	0.06325	0.0655	0.06475
13:30:06	0.0865	0.0795	0.06625	0.0675		13:30:06	0.0835	0.07425	0.0675	0.0685		13:30:06	0.07225	0.075	0.06375	0.0655		13:30:06	0.06175	0.065	0.06575	0.0655
14:00:06	0.0915	0.0785	0.0665	0.069		14:00:06	0.087	0.07075	0.0665	0.06925		14:00:06	0.07425	0.074	0.063	0.06625		14:00:06	0.06125	0.06025	0.0665	0.06625
14:30:06	0.097	0.08725	0.06875	0.0705		14:30:06	0.09125	0.0815	0.0675	0.07075		14:30:06	0.0785	0.08025	0.064	0.068		14:30:06	0.06175	0.06575	0.06725	0.06675
15:00:06	0.1035	0.08675	0.0685	0.072		15:00:06	0.09625	0.0725	0.06875	0.072		15:00:06	0.081	0.08225	0.06425	0.06875		15:00:06	0.06175	0.061	0.0645	0.06775
15:30:06	0.11025	0.09575	0.0705	0.07375		15:30:06	0.10125	0.08625	0.0705	0.07375		15:30:06	0.08525	0.08525	0.068	0.07025		15:30:06	0.062	0.06175	0.067	0.06825
16:00:06	0.11675	0.101	0.07175	0.07575		16:00:06	0.10625	0.08675	0.07175	0.0755		16:00:06	0.09025	0.091	0.068	0.07175		16:00:06	0.0615	0.06275	0.0675	0.069
16:30:06	0.123	0.107	0.07625	0.078		16:30:06	0.11125	0.09575	0.07475	0.078		16:30:06	0.09525	0.098	0.07025	0.074		16:30:06	0.062	0.0675	0.07	0.07
17:00:06	0.13175	0.115	0.07525	0.08075		17:00:06	0.118	0.09825	0.0745	0.07925		17:00:06	0.10075	0.10125	0.07	0.07525		17:00:06	0.062	0.06375	0.06775	0.07025
17:30:06	0.1395	0.119	0.0755	0.08375		17:30:06	0.1245	0.1045	0.074	0.0825		17:30:06	0.1065	0.10625	0.069	0.07825		17:30:06	0.06325	0.0635	0.06225	0.07175
18:00:06	0.1465	0.12825	0.07975	0.08775		18:00:06	0.12875	0.10975	0.079	0.08625		18:00:06	0.11175	0.1145	0.07325	0.081		18:00:06	0.06225	0.06375	0.0685	0.07275
18:30:06	0.15525	0.13575	0.08225	0.092		18:30:06	0.1345	0.11725	0.0815	0.08925		18:30:06	0.11975	0.12025	0.07525	0.084		18:30:06	0.0635	0.0645	0.06925	0.07375
19:00:06	0.16375	0.14375	0.0855	0.09725		19:00:06	0.14125	0.1235	0.085	0.09325		19:00:06	0.1255	0.12625	0.07725	0.08775		19:00:06	0.06275	0.065	0.0695	0.07525
19:30:06	0.17025	0.152	0.0895	0.102		19:30:06	0.146	0.1295	0.08825	0.09775		19:30:06	0.13175	0.133	0.08025	0.09125		19:30:06	0.0635	0.0655	0.07025	0.0765
20:00:06	0.1795	0.16	0.094	0.10775		20:00:06	0.15375	0.13675	0.09225	0.1025		20:00:06	0.13875	0.1405	0.083	0.095		20:00:06	0.06375	0.06625	0.071	0.07775
20:30:06	0.189	0.17025	0.099	0.11275		20:30:06	0.15875	0.14475	0.097	0.108		20:30:06	0.14675	0.1495	0.087	0.099		20:30:06	0.064	0.06675	0.072	0.0795
21:00:06	0.1965	0.1765	0.10475	0.11925		21:00:06	0.16575	0.1515	0.101	0.11375		21:00:06	0.15275	0.15575	0.0905	0.1035		21:00:06	0.06575	0.06825	0.07275	0.0815
21:30:06	0.20475	0.18525	0.11	0.12575		21:30:06	0.17075	0.158	0.10575	0.11925		21:30:06	0.1605	0.16425	0.0945	0.10875		21:30:06	0.06625	0.06925	0.0735	0.08325
22:00:06	0.212	0.192	0.116	0.1325		22:00:06	0.1765	0.16525	0.11	0.12475		22:00:06	0.16825	0.17175	0.0985	0.1135		22:00:06	0.06725	0.07075	0.0745	0.08475
22:30:06	0.22	0.20125	0.12175	0.13825		22:30:06	0.1825	0.17325	0.1145	0.12975		22:30:06	0.176	0.181	0.10325	0.1185		22:30:06	0.06825	0.072	0.0755	0.0865
23:00:06	0.228	0.2085	0.1285	0.14525		23:00:06	0.18875	0.1795	0.119	0.136		23:00:06	0.1845	0.18825	0.108	0.1235		23:00:06	0.06975	0.07375	0.07675	0.0885
23:30:06	0.2375	0.2205	0.1345	0.15225		23:30:06	0.1975	0.1885	0.12425	0.14225		23:30:06	0.1915	0.1955	0.1135	0.12925		23:30:06	0.07025	0.07575	0.07825	0.08975
24:00:06	0.245	0.22425	0.14075	0.158		24:00:06	0.2005	0.1945	0.12975	0.14875		24:00:06	0.1995	0.205	0.11825	0.13475		24:00:06	0.07125	0.07825	0.07975	0.0925
24:30:06	0.2545	0.232	0.14675	0.16425		24:30:06	0.205	0.2	0.13375	0.15525		24:30:06	0.2085	0.2125	0.1235	0.14025		24:30:06	0.073	0.081	0.08125	0.0945
25:00:06	0.265	0.246	0.1535	0.17075		25:00:06	0.215	0.20875	0.13775	0.16		25:00:06	0.21775	0.22	0.12875	0.146		25:00:06	0.076	0.08325	0.08275	0.09675
25:30:06	0.2745	0.2505	0.1595	0.17925		25:30:06	0.222	0.21475	0.14275	0.166		25:30:06	0.22575	0.22825	0.1345	0.1515		25:30:06	0.077	0.0865	0.08425	0.0985
26:00:06	0.28525	0.25975	0.16625	0.18625		26:00:06	0.23075	0.22375	0.14725	0.174		26:00:06	0.234	0.236	0.1395	0.1585		26:00:06	0.0795	0.089	0.08625	0.10075
26:30:06	0.299	0.2665	0.17375	0.19425		26:30:06	0.23475	0.23125	0.1515	0.17575		26:30:06	0.2425	0.246	0.145	0.16325		26:30:06	0.08125	0.0925	0.08825	0.10325
27:00:06	0.309	0.27925	0.1785	0.2065		27:00:06	0.24325	0.23775	0.1565	0.184		27:00:06	0.25275	0.254	0.15025	0.1705		27:00:06	0.0855	0.0945	0.08975	0.105
27:30:06	0.317	0.288	0.187	0.20425		27:30:06	0.249	0.24825	0.16075	0.1885		27:30:06	0.2605	0.26125	0.157	0.1755		27:30:06	0.08675	0.09825	0.0925	0.107
28:00:06	0.3255	0.3	0.192	0.21275		28:00:06	0.2555	0.2545	0.166	0.196		28:00:06	0.269	0.2705	0.1625	0.18325		28:00:06	0.0885	0.1005	0.09475	0.11
28:30:06	0.338	0.31125	0.19875	0.223		28:30:06	0.263	0.2645	0.1715	0.2		28:30:06	0.27625	0.27925	0.16875	0.18875		28:30:06	0.09125	0.10275	0.097	0.11275
29:00:06	0.351	0.32225	0.205	0.229		29:00:06	0.272	0.27225	0.175	0.20275		29:00:06	0.2935	0.28875	0.174	0.19425		29:00:06	0.0945	0.1065	0.0995	0.11425
29:30:06	0.36	0.32775	0.211	0.23475		29:30:06	0.2805	0.27975	0.1795	0.2135		29:30:06	0.295	0.29575	0.17975	0.205		29:30:06	0.09725	0.108	0.10125	0.1165
30:00:06	0.367	0.3405	0.22025	0.239		30:00:06	0.28925	0.28925	0.18475	0.21475		30:00:06	0.31	0.30125	0.1855	0.208		30:00:06	0.09975	0.11025	0.1045	0.1205
30:30:06	0.37475	0.3515	0.22975	0.24775		30:30:06	0.29825	0.29575	0.18975	0.22275		30:30:06	0.31175	0.31025	0.1945	0.214		30:30:06	0.1025	0.10975	0.1095	0.122
31:00:06	0.38375	0.35325	0.23025	0.258		31:00:06	0.3005	0.3035	0.19225	0.23		31:00:06	0.3225	0.31625	0.1965	0.21775		31:00:06	0.1035	0.111	0.10875	0.125
31:30:06	0.39125	0.361	0.23825	0.26		31:30:06	0.30725	0.31475	0.19675	0.2335		31:30:06	0.3275	0.3225	0.20375	0.22325		31:30:06	0.106	0.11325	0.11075	0.12825
32:00:06	0.39875	0.36825	0.247	0.273		32:00:06	0.3125	0.3245	0.20625	0.23775		32:00:06	0.3465	0.32975	0.2105	0.2305		32:00:06	0.10925	0.11275	0.11675	0.13125
32:30:06	0.406	0.375	0.2495	0.274		32:30:06	0.3215	0.3345	0.205	0.24675		32:30:06	0.3495	0.3465	0.216	0.24175		32:30:06	0.11	0.11825	0.1175	0.134
33:00:06	0.4115	0.38725	0.26	0.28525		33:00:06	0.326	0.3445	0.21275	0.25		33:00:06	0.3565	0.35175	0.2195	0.24625		33:00:06	0.11225	0.121	0.1205	0.13675
33:30:06	0.416	0.395	0.2655	0.29175		33:30:06	0.33375	0.34925	0.2155	0.257		33:30:06	0.36325	0.35775	0.2265	0.25225		33:30:06	0.1145	0.1225	0.12325	0.13925
34:00:06	0.427	0.401	0.27675	0.2955		34:00:06	0.343	0.3595	0.22425	0.2625		34:00:06	0.3745	0.37225	0.23175	0.2565		34:00:06	0.1165	0.125	0.12625	0.143
34:30:06	0.432	0.40625	0.28025	0.305		34:30:06	0.3485	0.36325	0.2245	0.271		34:30:06	0.38275	0.37375	0.23775	0.26375		34:30:06	0.117	0.125	0.12975	0.1455
35:00:06	0.441	0.41425	0.29075	0.31575		35:00:06	0.3535	0.37525	0.23575	0.275		35:00:06	0.38525	0.382	0.24175	0.2695		35:00:06	0.11925	0.12875	0.132	0.14825
35:30:06	0.44725	0.42225	0.29775	0.31925		35:30:06	0.35975	0.378	0.23725	0.278		35:30:06	0.392	0.39	0.25	0.27275		35:30:06	0.1215	0.129	0.1355	0.1515
36:00:06	0.454	0.42825	0.303	0.3235		36:00:06	0.36675	0.38425	0.244	0.284		36:00:06	0.39925	0.39375	0.25725	0.276		36:00:06	0.11975	0.13125	0.13725	0.15425
36:30:06	0.462	0.4335	0.31175	0.332		36:30:06	0.37425	0.39575	0.247	0.2905		36:30:06	0.40975	0.398	0.26375	0.283		36:30:06	0.12475	0.13275	0.14	0.1585
37:00:06	0.462	0.439	0.31675	0.341		37:00:06	0.3785	0.4015	0.25625	0.295		37:00:06	0.40875	0.40925	0.2715	0.2875		37:00:06	0.124	0.13375	0.1445	0.1615
37:30:06	0.47375	0.44725	0.32425	0.35		37:30:06	0.3865	0.4095	0.258	0.30175		37:30:06	0.4175	0.418	0.27975	0.2955		37:30:06	0.1305	0.13675	0.1455	0.16525
38:00:06	0.479	0.45225	0.33175	0.35425		38:00:06	0.38975	0.41825	0.2655	0.3055		38:00:06	0.4275	0.417	0.2835	0.29725		38:00:06	0.12775	0.138	0.1485	0.16675
38:30:06	0.48875	0.4595	0.34025	0.35775		38:30:06	0.3965	0.4235	0.2685	0.3095		38:30:06	0.428	0.42	0.28725	0.30175		38:30:06	0.13325	0.13975	0.151	0.17075
39:00:06	0.48875	0.4675	0.3455	0.3605		39:00:06	0.39975	0.43375	0.27625	0.312		39:00:06	0.43375	0.43025	0.29275	0.306		39:00:06	0.1345	0.13975	0.15425	0.17525
39:30:06	0.4955	0.47125	0.35175	0.3655		39:30:06	0.403	0.437	0.28225	0.31925		39:30:06	0.43875	0.441	0.294	0.30975		39:30:06	0.13625	0.143	0.15625	0.17875
40:00:06	0.5005	0.47775	0.35625	0.3745		40:00:06	0.41025	0.443	0.283	0.3225		40:00:06	0.4425	0.444	0.30075	0.3145		40:00:06	0.138	0.1435	0.15975	0.18
40:30:06	0.5035	0.4835	0.362	0.3805		40:30:06	0.4165	0.44825	0.28975	0.32875		40:30:06	0.4515	0.44525	0.3065	0.318		40:30:06	0.14075	0.146	0.1665	0.18225
41:00:06	0.50525	0.488	0.3725	0.385		41:00:06	0.4205	0.45075	0.29375	0.3305		41:00:06	0.4525	0.4485	0.31325	0.32125		41:00:06	0.1415	0.147	0.1675	0.18325
41:30:06	0.51575	0.4925	0.37875	0.39125		41:30:06	0.4245	0.45775	0.3	0.34175		41:30:06	0.45725	0.45075	0.3155	0.32925		41:30:06	0.146	0.149	0.16875	0.18675
42:00:06	0.517	0.496	0.38225	0.39725		42:00:06	0.4245	0.46475	0.3065	0.3435		42:00:06	0.4625	0.45125	0.32375	0.33525		42:00:06	0.1455	0.152	0.17025	0.1905
42:30:06	0.5215	0.50125	0.3895	0.4045		42:30:06	0.4275	0.4655	0.31125	0.3505		42:30:06	0.4635	0.4545	0.33125	0.34375		42:30:06	0.1485	0.153	0.17375	0.19575
43:00:06	0.52775	0.506	0.39375	0.40875		43:00:06	0.43475	0.4675	0.3165	0.352		43:00:06	0.47125	0.4605	0.3365	0.3495		43:00:06	0.151	0.155	0.178	0.20025
43:30:06	0.52925	0.51325	0.399	0.414		43:30:06	0.43975	0.47775	0.31875	0.3585		43:30:06	0.4755	0.4645	0.34	0.35025		43:30:06	0.153	0.15725	0.18	0.204
44:00:06	0.5395	0.51475	0.403	0.41725		44:00:06	0.44125	0.478	0.323	0.36125		44:00:06	0.4805	0.47025	0.34425	0.3535		44:00:06	0.15475	0.15925	0.18275	0.2065
44:30:06	0.541	0.52025	0.41	0.4235		44:30:06	0.446	0.48375	0.322	0.3655		44:30:06	0.48475	0.47075	0.35275	0.35975		44:30:06	0.1585	0.16275	0.1865	0.2095
45:00:06	0.547	0.5265	0.41675	0.42725		45:00:06	0.44875	0.4885	0.32775	0.36725		45:00:06	0.4885	0.47575	0.35925	0.363		45:00:06	0.15975	0.16325	0.18975	0.21225
45:30:06	0.55025	0.5305	0.4195	0.42825		45:30:06	0.452	0.4925	0.33025	0.3685		45:30:06	0.49225	0.48475	0.362	0.36775		45:30:06	0.16275	0.166	0.1925	0.215
46:00:06	0.55475	0.53575	0.42325	0.43375		46:00:06	0.45725	0.4995	0.341	0.36975		46:00:06	0.49775	0.48875	0.36275	0.3735		46:00:06	0.16575	0.1685	0.1995	0.221
46:30:06	0.55875	0.54075	0.42825	0.4375		46:30:06	0.45975	0.5015	0.34425	0.37275		46:30:06	0.5	0.49	0.36675	0.379		46:30:06	0.16625	0.171	0.20375	0.22275
47:00:06	0.564	0.54225	0.4295	0.43975		47:00:06	0.46225	0.50475	0.34925	0.37525		47:00:06	0.50525	0.49575	0.369	0.38075		47:00:06	0.16825	0.17225	0.20475	0.22575
47:30:06	0.567	0.5465	0.434	0.443		47:30:06	0.4635	0.506	0.34925	0.3795		47:30:06	0.51025	0.49625	0.37725	0.383		47:30:06	0.16775	0.17475	0.206	0.22875
48:00:06	0.56525	0.5525	0.438	0.4465		48:00:06	0.46625	0.51325	0.356	0.3785		48:00:06	0.511	0.4995	0.37825	0.38925		48:00:06	0.1725	0.179	0.2095	0.23
