# Supplementary material for: Synergistic and antagonistic drug interactions in the treatment of systemic fungal infections
Source: eLife. 2020 May 5;9:e54160. doi: 10.7554/eLife.54160 (PMC7200157; doi:10.7554/eLife.54160)
Supplement: Figure 6—source data 1. — OD600 from each of two different biological replicates. These data were averaged to produce the graphs in Figure 6I–L. [file elife-54160-fig6-data1.xlsx]

## Sheet: Sheet1
Experimental conditions: no drugs (vehicle control)												Experimental conditions: fluconazole alone												Experimental conditions: dicyclomine alone												Experimental conditions: fluconazole and dicyclomine combined
Time (hh:mm:ss)	Vehicle		20 μg/mL 5-FAA		10 μg/mL 5-FAA		5 μg/mL 5-FAA		2.5 μg/mL 5-FAA			Time (hh:mm:ss)	Vehicle		20 μg/mL 5-FAA		10 μg/mL 5-FAA		5 μg/mL 5-FAA		2.5 μg/mL 5-FAA			Time (hh:mm:ss)	Vehicle		20 μg/mL 5-FAA		10 μg/mL 5-FAA		5 μg/mL 5-FAA		2.5 μg/mL 5-FAA			Time (hh:mm:ss)	Vehicle		20 μg/mL 5-FAA		10 μg/mL 5-FAA		5 μg/mL 5-FAA		2.5 μg/mL 5-FAA
0:01:26	0.06475	0.0725	0.06525	0.07475	0.0655	0.076	0.064	0.082	0.06475	0.081		0:01:26	0.06625	0.08625	0.066	0.0945	0.066	0.09175	0.066	0.08875	0.06625	0.09725		0:01:26	0.06425	0.08	0.064	0.084	0.0645	0.083	0.06425	0.0845	0.06475	0.08575		0:01:26	0.06475	0.08275	0.066	0.09075	0.06525	0.0895	0.06525	0.091	0.065	0.099
0:30:06	0.06	0.06075	0.061	0.06	0.0605	0.06	0.059	0.06025	0.06025	0.06075		0:30:06	0.05975	0.0605	0.05975	0.05925	0.059	0.06025	0.05925	0.06	0.0595	0.06025		0:30:06	0.0595	0.0605	0.05875	0.06	0.05925	0.06	0.059	0.06	0.0595	0.06		0:30:06	0.0595	0.0605	0.06	0.06	0.059	0.0605	0.05925	0.06	0.059	0.06
1:00:06	0.05975	0.06125	0.06025	0.06	0.0605	0.06	0.059	0.06	0.05975	0.06125		1:00:06	0.0595	0.06075	0.0595	0.05975	0.059	0.0605	0.059	0.06025	0.0595	0.0605		1:00:06	0.059	0.0605	0.0585	0.0605	0.05875	0.05975	0.05875	0.06	0.05925	0.0605		1:00:06	0.05925	0.0605	0.0605	0.06	0.059	0.0605	0.05925	0.06025	0.059	0.06
1:30:06	0.06025	0.06075	0.06075	0.05975	0.06175	0.06	0.059	0.06	0.06025	0.0605		1:30:06	0.05975	0.06075	0.06025	0.05975	0.05925	0.05975	0.05925	0.06	0.06	0.06025		1:30:06	0.05975	0.0605	0.05925	0.06	0.0595	0.05975	0.05925	0.06	0.05975	0.06025		1:30:06	0.05975	0.0605	0.06075	0.06	0.059	0.06025	0.0595	0.06	0.0595	0.06
2:00:06	0.06	0.061	0.0605	0.05925	0.0615	0.06	0.059	0.06	0.05975	0.06025		2:00:06	0.0595	0.06075	0.06	0.05975	0.059	0.06	0.059	0.06	0.0595	0.06025		2:00:06	0.0595	0.06	0.0585	0.06075	0.05875	0.05975	0.059	0.06	0.0595	0.0605		2:00:06	0.05925	0.0605	0.06025	0.06	0.059	0.0605	0.059	0.06	0.05925	0.06
2:30:06	0.05975	0.05975	0.06025	0.05925	0.061	0.0595	0.059	0.05975	0.0595	0.0595		2:30:06	0.0595	0.059	0.06	0.058	0.059	0.05925	0.05875	0.0595	0.05925	0.059		2:30:06	0.0595	0.05975	0.0585	0.059	0.05875	0.058	0.059	0.05825	0.05925	0.0585		2:30:06	0.05925	0.059	0.06025	0.058	0.059	0.0585	0.059	0.05825	0.059	0.058
3:00:06	0.06025	0.06175	0.06025	0.0605	0.06175	0.061	0.059	0.061	0.06025	0.06175		3:00:06	0.0595	0.06125	0.061	0.06	0.059	0.06025	0.05925	0.06	0.0595	0.06075		3:00:06	0.0595	0.06175	0.059	0.06225	0.059	0.062	0.05925	0.06225	0.0595	0.063		3:00:06	0.05975	0.06225	0.061	0.06125	0.059	0.0615	0.05925	0.062	0.05925	0.062
3:30:06	0.06	0.06175	0.06	0.06075	0.0615	0.05975	0.059	0.05975	0.06025	0.06025		3:30:06	0.0595	0.06	0.0605	0.059	0.059	0.0595	0.059	0.06025	0.05925	0.0605		3:30:06	0.0595	0.06	0.0585	0.06025	0.05875	0.05975	0.05875	0.05925	0.05925	0.05975		3:30:06	0.05925	0.06075	0.05975	0.06025	0.059	0.061	0.059	0.06075	0.05925	0.0615
4:00:06	0.0605	0.05925	0.0605	0.05775	0.0615	0.0575	0.05925	0.058	0.06025	0.0585		4:00:06	0.0605	0.057	0.061	0.056	0.05925	0.057	0.05925	0.05725	0.05975	0.057		4:00:06	0.0595	0.05775	0.0585	0.05825	0.059	0.05775	0.059	0.058	0.05925	0.0585		4:00:06	0.05925	0.05825	0.06025	0.05775	0.059	0.0575	0.0595	0.0575	0.0595	0.058
4:30:06	0.06025	0.063	0.0605	0.06175	0.06175	0.062	0.059	0.06225	0.06	0.06275		4:30:06	0.06	0.0615	0.0605	0.06225	0.059	0.062	0.05925	0.06125	0.0595	0.06225		4:30:06	0.0595	0.06325	0.0585	0.0645	0.05875	0.0625	0.05875	0.0625	0.0595	0.064		4:30:06	0.05925	0.0605	0.0605	0.06125	0.059	0.06225	0.05925	0.06175	0.0595	0.06175
5:00:06	0.061	0.062	0.06025	0.0605	0.06125	0.0605	0.05925	0.061	0.06025	0.0615		5:00:06	0.06025	0.0585	0.0605	0.05675	0.059	0.05725	0.05925	0.0575	0.05925	0.0575		5:00:06	0.05975	0.06075	0.0585	0.0605	0.05875	0.06025	0.059	0.0605	0.0595	0.06125		5:00:06	0.05925	0.05975	0.0605	0.05875	0.059	0.05825	0.059	0.05825	0.05925	0.05875
5:30:06	0.0615	0.06225	0.0605	0.06025	0.06175	0.06025	0.05975	0.06075	0.06075	0.06075		5:30:06	0.0605	0.0615	0.06125	0.06	0.06	0.06125	0.06	0.06175	0.06	0.06175		5:30:06	0.06025	0.061	0.05925	0.061	0.05925	0.0605	0.0595	0.061	0.06	0.061		5:30:06	0.06	0.0615	0.06075	0.061	0.0595	0.061	0.0595	0.0605	0.0595	0.06075
6:00:06	0.06125	0.0575	0.06075	0.056	0.062	0.055	0.05975	0.05475	0.06075	0.0565		6:00:06	0.0605	0.05475	0.06125	0.05325	0.06	0.05325	0.0595	0.053	0.06	0.054		6:00:06	0.06025	0.05525	0.05925	0.05475	0.05925	0.055	0.05925	0.055	0.05975	0.05575		6:00:06	0.06	0.05525	0.06125	0.0545	0.05925	0.05475	0.05925	0.055	0.05975	0.0545
6:30:06	0.062	0.0645	0.06175	0.06375	0.06225	0.06325	0.06025	0.06275	0.06125	0.066		6:30:06	0.06125	0.062	0.0615	0.061	0.06	0.06225	0.06025	0.063	0.06025	0.063		6:30:06	0.06075	0.065	0.0595	0.06625	0.05975	0.065	0.05975	0.06675	0.06025	0.06475		6:30:06	0.06	0.06725	0.0615	0.06475	0.05925	0.06375	0.05925	0.06275	0.05975	0.06325
7:00:06	0.062	0.0615	0.061	0.05925	0.062	0.0595	0.05975	0.06	0.061	0.06025		7:00:06	0.0615	0.06	0.0615	0.05875	0.05975	0.05875	0.06025	0.059	0.0605	0.0595		7:00:06	0.0605	0.06075	0.059	0.06	0.05925	0.059	0.059	0.059	0.06	0.05925		7:00:06	0.06	0.06	0.06075	0.059	0.059	0.0595	0.05925	0.05975	0.0595	0.05925
7:30:06	0.062	0.06225	0.06125	0.06	0.06175	0.06	0.06	0.0605	0.061	0.061		7:30:06	0.06125	0.061	0.0615	0.0595	0.06025	0.06025	0.06075	0.06025	0.0605	0.06075		7:30:06	0.0605	0.06075	0.059	0.06	0.05875	0.0595	0.05875	0.06	0.05975	0.06		7:30:06	0.059	0.06	0.0605	0.05925	0.059	0.05975	0.05925	0.06	0.0595	0.05975
8:00:06	0.0635	0.06375	0.0625	0.06225	0.06325	0.0635	0.06075	0.0645	0.06225	0.0635		8:00:06	0.0625	0.06	0.06225	0.059	0.061	0.0605	0.0615	0.06125	0.0615	0.0615		8:00:06	0.062	0.065	0.05975	0.06275	0.06	0.06075	0.06	0.06275	0.06075	0.06175		8:00:06	0.061	0.05975	0.062	0.05825	0.06	0.05925	0.06025	0.059	0.06075	0.05875
8:30:06	0.06325	0.06175	0.062	0.06	0.0625	0.06	0.0605	0.061	0.062	0.061		8:30:06	0.06275	0.064	0.0625	0.06125	0.061	0.05875	0.06225	0.058	0.06175	0.0585		8:30:06	0.0615	0.06025	0.05925	0.0595	0.0595	0.05825	0.0595	0.0585	0.06025	0.0585		8:30:06	0.06	0.058	0.06075	0.05825	0.0595	0.062	0.06	0.064	0.05975	0.0605
9:00:06	0.063	0.066	0.0615	0.063	0.061	0.06425	0.059	0.065	0.0605	0.06525		9:00:06	0.06175	0.06725	0.06225	0.06525	0.061	0.06475	0.06175	0.06425	0.062	0.067		9:00:06	0.0595	0.06775	0.05725	0.06475	0.058	0.06375	0.05775	0.0635	0.0585	0.0635		9:00:06	0.05825	0.06525	0.05825	0.06375	0.057	0.06525	0.057	0.066	0.057	0.06475
9:30:06	0.06575	0.06775	0.0635	0.0645	0.064	0.0625	0.0625	0.0615	0.064	0.06375		9:30:06	0.0655	0.0635	0.0635	0.06025	0.062	0.06125	0.06275	0.062	0.0625	0.062		9:30:06	0.063	0.0645	0.0605	0.063	0.0605	0.063	0.06075	0.062	0.06175	0.063		9:30:06	0.0615	0.06475	0.06225	0.0645	0.06	0.0635	0.0605	0.06275	0.06075	0.06375
10:00:06	0.06625	0.063	0.06325	0.06	0.063	0.0605	0.06225	0.061	0.0635	0.06125		10:00:06	0.06525	0.05925	0.0635	0.0575	0.06175	0.05825	0.0635	0.05825	0.063	0.05925		10:00:06	0.06275	0.0625	0.05925	0.05925	0.05925	0.05875	0.05975	0.0595	0.0605	0.06		10:00:06	0.0605	0.058	0.06125	0.05725	0.059	0.05775	0.05925	0.05675	0.05975	0.05725
10:30:06	0.06775	0.0655	0.064	0.0615	0.064	0.0625	0.06275	0.0635	0.065	0.063		10:30:06	0.0655	0.065	0.06325	0.06075	0.063	0.059	0.0645	0.065	0.06425	0.0635		10:30:06	0.06375	0.064	0.05975	0.061	0.06025	0.06125	0.06025	0.06225	0.06125	0.06325		10:30:06	0.061	0.061	0.06175	0.06025	0.059	0.061	0.059	0.06225	0.06075	0.06075
11:00:06	0.07	0.06575	0.066	0.06325	0.06475	0.06325	0.06425	0.06325	0.0675	0.064		11:00:06	0.07025	0.0605	0.06575	0.0585	0.065	0.06125	0.06625	0.063	0.067	0.0615		11:00:06	0.06425	0.0645	0.06075	0.0625	0.06125	0.06175	0.06125	0.063	0.06275	0.0655		11:00:06	0.06225	0.06875	0.06325	0.05775	0.0615	0.05725	0.0615	0.059	0.06175	0.05925
11:30:06	0.072	0.0675	0.066	0.06225	0.06475	0.0625	0.0655	0.064	0.0675	0.06425		11:30:06	0.0695	0.0645	0.0635	0.06075	0.0635	0.062	0.0655	0.06175	0.06525	0.06275		11:30:06	0.06475	0.06525	0.0595	0.061	0.06	0.06075	0.05975	0.061	0.0615	0.06175		11:30:06	0.0605	0.06125	0.06125	0.06	0.059	0.0605	0.0595	0.061	0.05975	0.06075
12:00:06	0.0745	0.07	0.0675	0.06375	0.06575	0.06425	0.0665	0.06525	0.0695	0.06575		12:00:06	0.0725	0.066	0.0655	0.06175	0.0655	0.0625	0.06825	0.06275	0.068	0.06375		12:00:06	0.067	0.06675	0.06025	0.0615	0.06025	0.061	0.0605	0.062	0.06275	0.06225		12:00:06	0.06125	0.0615	0.06225	0.06025	0.05975	0.061	0.06025	0.0615	0.06075	0.061
12:30:06	0.0785	0.07175	0.07025	0.06425	0.06825	0.06525	0.0695	0.0665	0.073	0.0665		12:30:06	0.0775	0.06775	0.0685	0.062	0.068	0.06325	0.07125	0.06325	0.07075	0.06475		12:30:06	0.06925	0.068	0.0615	0.0615	0.06225	0.0615	0.0625	0.062	0.064	0.06275		12:30:06	0.06275	0.06175	0.064	0.06025	0.0615	0.06125	0.0625	0.0615	0.0625	0.06125
13:00:06	0.0815	0.07425	0.07	0.06625	0.06825	0.0675	0.06975	0.069	0.0745	0.06875		13:00:06	0.07875	0.07	0.068	0.063	0.06825	0.06425	0.07225	0.06475	0.07175	0.06625		13:00:06	0.0695	0.071	0.06	0.0625	0.0605	0.06275	0.061	0.063	0.06325	0.06425		13:00:06	0.061	0.06325	0.062	0.06125	0.0595	0.06225	0.06025	0.063	0.0605	0.062
13:30:06	0.0865	0.0795	0.0725	0.06925	0.07075	0.07125	0.073	0.07325	0.0775	0.07325		13:30:06	0.0835	0.07425	0.0705	0.066	0.07125	0.06675	0.07575	0.066	0.07525	0.06825		13:30:06	0.07225	0.075	0.0605	0.06525	0.0615	0.06425	0.06175	0.06575	0.0645	0.06625		13:30:06	0.06175	0.065	0.06225	0.06375	0.06025	0.065	0.0605	0.06525	0.0615	0.064
14:00:06	0.0915	0.0785	0.0745	0.0645	0.07225	0.0685	0.07525	0.0725	0.081	0.0695		14:00:06	0.087	0.07075	0.07175	0.0625	0.073	0.06475	0.078	0.06475	0.0775	0.067		14:00:06	0.07425	0.074	0.0605	0.06075	0.0615	0.06075	0.06175	0.062	0.06475	0.06225		14:00:06	0.06125	0.06025	0.06175	0.058	0.05975	0.0585	0.0605	0.05825	0.0605	0.05825
14:30:06	0.097	0.08725	0.07825	0.07075	0.076	0.0725	0.0795	0.074	0.08575	0.07475		14:30:06	0.09125	0.0815	0.07525	0.06975	0.076	0.07075	0.08225	0.07075	0.08175	0.073		14:30:06	0.0785	0.08025	0.0615	0.06575	0.06225	0.065	0.06275	0.06675	0.066	0.06875		14:30:06	0.06175	0.06575	0.06275	0.0625	0.06	0.06425	0.06075	0.0645	0.06175	0.063
15:00:06	0.1035	0.08675	0.0815	0.06725	0.0785	0.071	0.08275	0.0735	0.0905	0.074		15:00:06	0.09625	0.0725	0.07775	0.061	0.0795	0.064	0.08625	0.0645	0.0855	0.067		15:00:06	0.081	0.08225	0.061	0.062	0.06225	0.0625	0.063	0.06325	0.067	0.06575		15:00:06	0.06175	0.061	0.06275	0.05775	0.0605	0.05725	0.0615	0.0565	0.062	0.058
15:30:06	0.11025	0.09575	0.0855	0.07375	0.08175	0.078	0.08525	0.08075	0.09475	0.081		15:30:06	0.10125	0.08625	0.082	0.07125	0.083	0.0725	0.08925	0.07275	0.08925	0.07625		15:30:06	0.08525	0.08525	0.061	0.0615	0.06275	0.0625	0.06325	0.06275	0.06825	0.0655		15:30:06	0.062	0.06175	0.06275	0.0605	0.06	0.06325	0.061	0.06375	0.062	0.0655
16:00:06	0.11675	0.101	0.09025	0.077	0.08675	0.08025	0.09125	0.0835	0.099	0.084		16:00:06	0.10625	0.08675	0.085	0.06825	0.08675	0.072	0.09225	0.073	0.09225	0.0765		16:00:06	0.09025	0.091	0.061	0.0625	0.06225	0.063	0.0635	0.0655	0.069	0.06775		16:00:06	0.0615	0.06275	0.06225	0.0605	0.05975	0.06125	0.0615	0.0625	0.062	0.062
16:30:06	0.123	0.107	0.09425	0.07925	0.09025	0.08575	0.0945	0.0895	0.1035	0.08825		16:30:06	0.11125	0.09575	0.08775	0.073	0.091	0.078	0.0965	0.07675	0.09725	0.08		16:30:06	0.09525	0.098	0.06125	0.06525	0.063	0.067	0.06425	0.07025	0.07075	0.07275		16:30:06	0.062	0.0675	0.06275	0.06625	0.05975	0.06625	0.061	0.067	0.0625	0.065
17:00:06	0.13175	0.115	0.09975	0.084	0.0955	0.08875	0.1	0.09175	0.1085	0.09275		17:00:06	0.118	0.09825	0.09225	0.07325	0.09575	0.0785	0.10025	0.0795	0.10125	0.084		17:00:06	0.10075	0.10125	0.062	0.06275	0.06375	0.06425	0.06525	0.06825	0.07325	0.0705		17:00:06	0.062	0.06375	0.063	0.0615	0.06075	0.06225	0.0615	0.06325	0.06275	0.06275
17:30:06	0.1395	0.119	0.10475	0.0895	0.10075	0.0925	0.10375	0.0965	0.113	0.096		17:30:06	0.1245	0.1045	0.0965	0.0765	0.10025	0.084	0.105	0.08575	0.10675	0.09125		17:30:06	0.1065	0.10625	0.0625	0.0635	0.06475	0.0655	0.06675	0.07075	0.076	0.074		17:30:06	0.06325	0.0635	0.06425	0.06375	0.0615	0.06575	0.06275	0.06425	0.06425	0.064
18:00:06	0.1465	0.12825	0.109	0.094	0.1045	0.0985	0.10775	0.101	0.117	0.10075		18:00:06	0.12875	0.10975	0.0975	0.079	0.10225	0.08575	0.107	0.087	0.10925	0.09325		18:00:06	0.11175	0.1145	0.062	0.0635	0.0645	0.066	0.067	0.0715	0.07775	0.075		18:00:06	0.06225	0.06375	0.06325	0.0615	0.05975	0.063	0.06125	0.065	0.063	0.064
18:30:06	0.15525	0.13575	0.11325	0.098	0.1095	0.103	0.111	0.105	0.1225	0.1055		18:30:06	0.1345	0.11725	0.1015	0.08225	0.107	0.08975	0.112	0.091	0.11425	0.0975		18:30:06	0.11975	0.12025	0.0625	0.064	0.06575	0.06675	0.06875	0.07325	0.08075	0.077		18:30:06	0.0635	0.0645	0.06425	0.06175	0.06075	0.06325	0.0625	0.0655	0.06475	0.065
19:00:06	0.16375	0.14375	0.11775	0.10275	0.1145	0.108	0.1175	0.1095	0.127	0.10925		19:00:06	0.14125	0.1235	0.105	0.086	0.1115	0.09425	0.1155	0.09475	0.1185	0.1015		19:00:06	0.1255	0.12625	0.06275	0.064	0.06675	0.0675	0.06975	0.0755	0.08425	0.08025		19:00:06	0.06275	0.065	0.06375	0.062	0.06075	0.06325	0.0625	0.06575	0.065	0.065
19:30:06	0.17025	0.152	0.121	0.10725	0.11775	0.11225	0.11975	0.114	0.13075	0.114		19:30:06	0.146	0.1295	0.1065	0.08925	0.1145	0.09875	0.11825	0.0985	0.12175	0.10675		19:30:06	0.13175	0.133	0.063	0.0645	0.0675	0.069	0.0715	0.07825	0.0885	0.08375		19:30:06	0.0635	0.0655	0.0635	0.0625	0.06025	0.064	0.06225	0.06675	0.065	0.06575
20:00:06	0.1795	0.16	0.1255	0.11225	0.1225	0.118	0.12525	0.118	0.1355	0.11875		20:00:06	0.15375	0.13675	0.111	0.09325	0.1195	0.1035	0.122	0.10225	0.1265	0.11125		20:00:06	0.13875	0.1405	0.06375	0.065	0.06875	0.07025	0.07425	0.081	0.09275	0.0875		20:00:06	0.06375	0.06625	0.0635	0.0625	0.061	0.06425	0.063	0.06775	0.066	0.066
20:30:06	0.189	0.17025	0.13025	0.11675	0.128	0.12225	0.13075	0.1225	0.1405	0.12325		20:30:06	0.15875	0.14475	0.1145	0.097	0.1235	0.1075	0.12625	0.1065	0.13075	0.11575		20:30:06	0.14675	0.1495	0.0645	0.066	0.0705	0.072	0.0765	0.08475	0.0955	0.0925		20:30:06	0.064	0.06675	0.06425	0.063	0.06025	0.065	0.063	0.06825	0.0665	0.06725
21:00:06	0.1965	0.1765	0.13425	0.122	0.13175	0.12775	0.13225	0.127	0.14375	0.12775		21:00:06	0.16575	0.1515	0.1185	0.1005	0.1285	0.11225	0.13125	0.111	0.13625	0.122		21:00:06	0.15275	0.15575	0.06475	0.066	0.07225	0.07375	0.08	0.0885	0.09975	0.0965		21:00:06	0.06575	0.06825	0.06575	0.0635	0.0615	0.0655	0.06475	0.06925	0.0685	0.06775
21:30:06	0.20475	0.18525	0.13725	0.12625	0.13625	0.132	0.1365	0.13025	0.1475	0.13125		21:30:06	0.17075	0.158	0.11975	0.104	0.13125	0.117	0.1335	0.1145	0.13925	0.126		21:30:06	0.1605	0.16425	0.066	0.0665	0.07425	0.0755	0.08325	0.0925	0.10425	0.1005		21:30:06	0.06625	0.06925	0.06575	0.06375	0.0615	0.066	0.06475	0.0705	0.0695	0.069
22:00:06	0.212	0.192	0.141	0.13025	0.14	0.13625	0.143	0.13525	0.153	0.1365		22:00:06	0.1765	0.16525	0.12325	0.1075	0.1355	0.121	0.1355	0.11925	0.14225	0.13225		22:00:06	0.16825	0.17175	0.0665	0.0675	0.07625	0.078	0.08625	0.09675	0.10775	0.10425		22:00:06	0.06725	0.07075	0.06675	0.06425	0.0625	0.067	0.066	0.0725	0.0715	0.0705
22:30:06	0.22	0.20125	0.1445	0.1335	0.14375	0.1405	0.14275	0.13825	0.155	0.14		22:30:06	0.1825	0.17325	0.12625	0.11125	0.13875	0.12625	0.1395	0.1225	0.1475	0.13625		22:30:06	0.176	0.181	0.06775	0.0675	0.0785	0.081	0.0895	0.09975	0.111	0.1085		22:30:06	0.06825	0.072	0.06675	0.0645	0.06225	0.0675	0.066	0.07275	0.0725	0.0715
23:00:06	0.228	0.2085	0.148	0.13825	0.14775	0.145	0.14675	0.14175	0.15875	0.14325		23:00:06	0.18875	0.1795	0.1275	0.1145	0.142	0.13	0.14225	0.12675	0.15	0.1415		23:00:06	0.1845	0.18825	0.0685	0.069	0.081	0.08275	0.09225	0.104	0.11425	0.1125		23:00:06	0.06975	0.07375	0.0675	0.06475	0.063	0.0685	0.0675	0.07475	0.0745	0.07275
23:30:06	0.2375	0.2205	0.15175	0.14125	0.15025	0.14825	0.1495	0.146	0.1625	0.14875		23:30:06	0.1975	0.1885	0.13025	0.11725	0.14575	0.13275	0.145	0.1305	0.15325	0.14625		23:30:06	0.1915	0.1955	0.0695	0.07	0.08325	0.087	0.095	0.10775	0.11775	0.1165		23:30:06	0.07025	0.07575	0.0675	0.0655	0.06225	0.06975	0.0675	0.07775	0.0755	0.0755
24:00:06	0.245	0.22425	0.1545	0.14425	0.15325	0.152	0.15225	0.149	0.16525	0.15175		24:00:06	0.2005	0.1945	0.13	0.12125	0.14775	0.138	0.1485	0.13375	0.15775	0.1505		24:00:06	0.1995	0.205	0.07	0.071	0.08475	0.091	0.0975	0.111	0.123	0.121		24:00:06	0.07125	0.07825	0.0685	0.0665	0.063	0.071	0.06875	0.07925	0.07925	0.077
24:30:06	0.2545	0.232	0.157	0.149	0.157	0.156	0.15675	0.15225	0.16825	0.155		24:30:06	0.205	0.2	0.135	0.1245	0.151	0.14175	0.1495	0.13675	0.15975	0.15425		24:30:06	0.2085	0.2125	0.07225	0.0725	0.08925	0.09425	0.1	0.1145	0.12425	0.1235		24:30:06	0.073	0.081	0.06975	0.067	0.0635	0.07225	0.0695	0.08125	0.08075	0.079
25:00:06	0.265	0.246	0.16125	0.15025	0.16125	0.158	0.158	0.15425	0.17075	0.15775		25:00:06	0.215	0.20875	0.13825	0.12725	0.1545	0.14525	0.1515	0.139	0.1625	0.15725		25:00:06	0.21775	0.22	0.07425	0.0735	0.09325	0.09725	0.1035	0.11725	0.12825	0.12675		25:00:06	0.076	0.08325	0.07125	0.06775	0.065	0.07375	0.07225	0.08375	0.08475	0.081
25:30:06	0.2745	0.2505	0.1635	0.15425	0.163	0.162	0.161	0.15775	0.176	0.1615		25:30:06	0.222	0.21475	0.1385	0.13025	0.1575	0.14925	0.15525	0.14175	0.16725	0.16075		25:30:06	0.22575	0.22825	0.076	0.07525	0.095	0.10125	0.1055	0.12025	0.13175	0.12975		25:30:06	0.077	0.0865	0.0715	0.06875	0.065	0.07575	0.07325	0.08725	0.08725	0.08475
26:00:06	0.28525	0.25975	0.1665	0.1575	0.16525	0.165	0.162	0.16075	0.1765	0.1645		26:00:06	0.23075	0.22375	0.1425	0.133	0.16075	0.152	0.15725	0.1455	0.1705	0.16525		26:00:06	0.234	0.236	0.07825	0.077	0.0995	0.10475	0.1075	0.12275	0.1335	0.1335		26:00:06	0.0795	0.089	0.0735	0.06925	0.06575	0.0775	0.0745	0.09	0.0895	0.08725
26:30:06	0.299	0.2665	0.16825	0.16125	0.169	0.169	0.16725	0.16325	0.18025	0.168		26:30:06	0.23475	0.23125	0.14175	0.13525	0.16125	0.155	0.15825	0.14825	0.173	0.16875		26:30:06	0.2425	0.246	0.07975	0.079	0.10275	0.10825	0.10875	0.125	0.1355	0.13525		26:30:06	0.08125	0.0925	0.07375	0.07075	0.06625	0.0795	0.076	0.09325	0.09325	0.0905
27:00:06	0.309	0.27925	0.17325	0.1615	0.1705	0.17	0.1695	0.16425	0.18475	0.169		27:00:06	0.24325	0.23775	0.145	0.1375	0.16525	0.157	0.16375	0.151	0.1785	0.173		27:00:06	0.25275	0.254	0.083	0.08125	0.10675	0.11075	0.113	0.1265	0.1455	0.13775		27:00:06	0.0855	0.0945	0.077	0.0715	0.0685	0.0815	0.08	0.095	0.09925	0.09275
27:30:06	0.317	0.288	0.17275	0.16525	0.17475	0.17375	0.17175	0.1665	0.18525	0.1725		27:30:06	0.249	0.24825	0.147	0.13975	0.16675	0.15975	0.16275	0.15225	0.17725	0.175		27:30:06	0.2605	0.26125	0.08475	0.08375	0.11	0.11375	0.1135	0.12925	0.143	0.141		27:30:06	0.08675	0.09825	0.07825	0.07325	0.06875	0.0845	0.081	0.0975	0.10125	0.095
28:00:06	0.3255	0.3	0.1745	0.16675	0.176	0.175	0.17275	0.16875	0.1865	0.175		28:00:06	0.2555	0.2545	0.14775	0.14125	0.16775	0.162	0.16325	0.15425	0.17875	0.17675		28:00:06	0.269	0.2705	0.08625	0.086	0.1125	0.11725	0.1145	0.13075	0.1465	0.14375		28:00:06	0.0885	0.1005	0.079	0.075	0.069	0.0875	0.08275	0.10125	0.10325	0.09925
28:30:06	0.338	0.31125	0.17725	0.16975	0.17975	0.17825	0.17675	0.17125	0.19075	0.1775		28:30:06	0.263	0.2645	0.14925	0.1435	0.17025	0.16525	0.166	0.15775	0.18275	0.1805		28:30:06	0.27625	0.27925	0.089	0.08875	0.115	0.121	0.1165	0.13325	0.15075	0.1475		28:30:06	0.09125	0.10275	0.08175	0.077	0.0705	0.09075	0.08525	0.10375	0.1075	0.10175
29:00:06	0.351	0.32225	0.18175	0.17225	0.1825	0.182	0.1785	0.17375	0.195	0.1805		29:00:06	0.272	0.27225	0.15175	0.1455	0.17325	0.1695	0.169	0.161	0.1865	0.18625		29:00:06	0.2935	0.28875	0.092	0.09175	0.12075	0.12375	0.11925	0.13525	0.1525	0.14925		29:00:06	0.0945	0.1065	0.083	0.0785	0.072	0.0935	0.088	0.1065	0.111	0.105
29:30:06	0.36	0.32775	0.18425	0.1745	0.186	0.18275	0.18275	0.1765	0.1985	0.1835		29:30:06	0.2805	0.27975	0.1525	0.14675	0.176	0.171	0.171	0.161	0.18825	0.187		29:30:06	0.295	0.29575	0.0945	0.0935	0.1225	0.12575	0.12225	0.137	0.15625	0.1505		29:30:06	0.09725	0.108	0.0865	0.0805	0.07375	0.096	0.091	0.11	0.115	0.1085
30:00:06	0.367	0.3405	0.18525	0.17575	0.18825	0.185	0.18025	0.17875	0.1975	0.186		30:00:06	0.28925	0.28925	0.1515	0.14925	0.17625	0.173	0.17175	0.16425	0.19	0.19225		30:00:06	0.31	0.30125	0.09575	0.09725	0.127	0.12875	0.1245	0.14025	0.15625	0.155		30:00:06	0.09975	0.11025	0.08775	0.083	0.07475	0.099	0.09425	0.1125	0.11825	0.1115
30:30:06	0.37475	0.3515	0.18775	0.1805	0.1915	0.193	0.18525	0.18925	0.2005	0.19075		30:30:06	0.29825	0.29575	0.15425	0.147	0.18025	0.17125	0.17375	0.1625	0.19375	0.19275		30:30:06	0.31175	0.31025	0.099	0.09825	0.12925	0.1285	0.127	0.1395	0.158	0.1545		30:30:06	0.1025	0.10975	0.091	0.08275	0.07825	0.1	0.098	0.11125	0.12125	0.1105
31:00:06	0.38375	0.35325	0.189	0.1775	0.19225	0.1885	0.1855	0.18175	0.2025	0.188		31:00:06	0.3005	0.3035	0.155	0.1495	0.1815	0.1765	0.1745	0.172	0.19475	0.198		31:00:06	0.3225	0.31625	0.10075	0.1005	0.13075	0.13075	0.12775	0.14075	0.16075	0.15625		31:00:06	0.1035	0.111	0.09225	0.0855	0.0785	0.1035	0.0985	0.1135	0.12225	0.1125
31:30:06	0.39125	0.361	0.193	0.181	0.19675	0.191	0.189	0.18225	0.2065	0.1895		31:30:06	0.30725	0.31475	0.15625	0.152	0.185	0.179	0.17725	0.1685	0.19825	0.1995		31:30:06	0.3275	0.3225	0.10375	0.102	0.1345	0.13275	0.13125	0.14975	0.16475	0.15775		31:30:06	0.106	0.11325	0.09575	0.08925	0.082	0.10675	0.1025	0.11575	0.12525	0.1165
32:00:06	0.39875	0.36825	0.19675	0.184	0.19975	0.193	0.19025	0.18375	0.2095	0.19175		32:00:06	0.3125	0.3245	0.15575	0.15125	0.1865	0.176	0.18225	0.16975	0.204	0.202		32:00:06	0.3465	0.32975	0.107	0.1035	0.13925	0.1355	0.1325	0.149	0.1685	0.161		32:00:06	0.10925	0.11275	0.09825	0.08625	0.08425	0.10425	0.105	0.11725	0.13025	0.1165
32:30:06	0.406	0.375	0.196	0.1915	0.20025	0.20075	0.19125	0.1895	0.211	0.199		32:30:06	0.3215	0.3345	0.1605	0.1565	0.191	0.18275	0.18425	0.17425	0.207	0.207		32:30:06	0.3495	0.3465	0.1095	0.1075	0.13875	0.14175	0.1305	0.1515	0.167	0.16625		32:30:06	0.11	0.11825	0.0995	0.0955	0.086	0.11475	0.10675	0.12275	0.131	0.125
33:00:06	0.4115	0.38725	0.19825	0.1925	0.20275	0.2025	0.19625	0.19125	0.21575	0.20175		33:00:06	0.326	0.3445	0.1615	0.15875	0.195	0.186	0.18625	0.179	0.20925	0.21175		33:00:06	0.3565	0.35175	0.112	0.1115	0.1415	0.14775	0.1355	0.1515	0.17225	0.1705		33:00:06	0.11225	0.121	0.10275	0.09975	0.08975	0.11775	0.1095	0.128	0.134	0.126
33:30:06	0.416	0.395	0.2015	0.19525	0.2055	0.20375	0.1975	0.193	0.217	0.20375		33:30:06	0.33375	0.34925	0.163	0.16	0.19725	0.18875	0.18975	0.18275	0.21375	0.21675		33:30:06	0.36325	0.35775	0.11525	0.1145	0.14475	0.14675	0.13675	0.15225	0.1725	0.17125		33:30:06	0.1145	0.1225	0.10675	0.10125	0.093	0.1195	0.11125	0.12675	0.13525	0.129
34:00:06	0.427	0.401	0.20375	0.198	0.20675	0.208	0.1965	0.19775	0.21925	0.2085		34:00:06	0.343	0.3595	0.168	0.1625	0.20125	0.1955	0.1945	0.187	0.21775	0.222		34:00:06	0.3745	0.37225	0.11625	0.11725	0.14775	0.15175	0.13875	0.158	0.174	0.17475		34:00:06	0.1165	0.125	0.1075	0.105	0.09475	0.123	0.11275	0.132	0.13725	0.1335
34:30:06	0.432	0.40625	0.203	0.20025	0.2065	0.21	0.19825	0.1965	0.223	0.20875		34:30:06	0.3485	0.36325	0.16825	0.1625	0.202	0.196	0.19625	0.19	0.221	0.2275		34:30:06	0.38275	0.37375	0.119	0.119	0.1475	0.1505	0.14175	0.161	0.1765	0.17575		34:30:06	0.117	0.125	0.10925	0.107	0.09675	0.12525	0.11475	0.12925	0.1395	0.133
35:00:06	0.441	0.41425	0.2035	0.20075	0.208	0.21075	0.2	0.1995	0.22625	0.213		35:00:06	0.3535	0.37525	0.16975	0.165	0.20575	0.201	0.2	0.193	0.22425	0.2315		35:00:06	0.38525	0.382	0.12125	0.12075	0.1525	0.1545	0.1445	0.163	0.17925	0.17725		35:00:06	0.11925	0.12875	0.11225	0.109	0.10025	0.1285	0.1185	0.13525	0.14325	0.1345
35:30:06	0.44725	0.42225	0.20375	0.2005	0.20925	0.21075	0.199	0.202	0.22775	0.21675		35:30:06	0.35975	0.378	0.171	0.1655	0.20725	0.20375	0.2005	0.1995	0.22525	0.23875		35:30:06	0.392	0.39	0.12375	0.1245	0.15575	0.155	0.147	0.16575	0.17975	0.17975		35:30:06	0.1215	0.129	0.11525	0.1105	0.1035	0.13	0.11975	0.13725	0.142	0.138
36:00:06	0.454	0.42825	0.20375	0.20275	0.20875	0.213	0.19925	0.20075	0.22975	0.21775		36:00:06	0.36675	0.38425	0.17375	0.16725	0.208	0.20625	0.2025	0.20125	0.22925	0.2415		36:00:06	0.39925	0.39375	0.124	0.1265	0.15275	0.1585	0.14475	0.16825	0.1805	0.18125		36:00:06	0.11975	0.13125	0.1145	0.11325	0.104	0.13275	0.11975	0.136	0.141	0.1365
36:30:06	0.462	0.4335	0.20675	0.2065	0.21275	0.2165	0.2045	0.2045	0.23625	0.223		36:30:06	0.37425	0.39575	0.17675	0.17175	0.21075	0.2115	0.20575	0.20675	0.2345	0.2485		36:30:06	0.40975	0.398	0.128	0.12875	0.15675	0.159	0.14675	0.168	0.18575	0.18325		36:30:06	0.12475	0.13275	0.117	0.116	0.108	0.136	0.121	0.13675	0.14375	0.138
37:00:06	0.462	0.439	0.20575	0.2065	0.211	0.217	0.202	0.2055	0.2395	0.227		37:00:06	0.3785	0.4015	0.17725	0.175	0.20925	0.214	0.20475	0.208	0.236	0.25425		37:00:06	0.40875	0.40925	0.12675	0.13025	0.158	0.16325	0.1465	0.1695	0.1845	0.1855		37:00:06	0.124	0.13375	0.11825	0.118	0.1095	0.139	0.1235	0.139	0.1435	0.13975
37:30:06	0.47375	0.44725	0.20825	0.20725	0.2145	0.21875	0.20575	0.2055	0.2445	0.22975		37:30:06	0.3865	0.4095	0.18025	0.176	0.21125	0.21525	0.2075	0.20975	0.241	0.2585		37:30:06	0.4175	0.418	0.13025	0.132	0.163	0.16375	0.149	0.16825	0.18975	0.185		37:30:06	0.1305	0.13675	0.12225	0.11875	0.114	0.13825	0.12625	0.14225	0.1495	0.14275
38:00:06	0.479	0.45225	0.20725	0.2105	0.21375	0.22125	0.206	0.20875	0.2495	0.236		38:00:06	0.38975	0.41825	0.1795	0.17825	0.2115	0.21925	0.2075	0.2115	0.24475	0.2635		38:00:06	0.4275	0.417	0.13175	0.13325	0.163	0.165	0.14825	0.1705	0.19025	0.18975		38:00:06	0.12775	0.138	0.122	0.12225	0.11675	0.1395	0.125	0.14675	0.1495	0.1445
38:30:06	0.48875	0.4595	0.2085	0.2115	0.21475	0.2215	0.21125	0.20775	0.2555	0.238		38:30:06	0.3965	0.4235	0.1815	0.17975	0.21225	0.21975	0.20975	0.2135	0.24925	0.269		38:30:06	0.428	0.42	0.134	0.13575	0.16325	0.1665	0.1505	0.1725	0.1975	0.19125		38:30:06	0.13325	0.13975	0.12425	0.1235	0.118	0.142	0.1285	0.14575	0.153	0.14425
39:00:06	0.48875	0.4675	0.20975	0.21225	0.21575	0.22275	0.21075	0.21175	0.2595	0.24475		39:00:06	0.39975	0.43375	0.18225	0.18325	0.21475	0.2235	0.21025	0.216	0.255	0.277		39:00:06	0.43375	0.43025	0.13575	0.137	0.166	0.1695	0.15025	0.17525	0.19625	0.19475		39:00:06	0.1345	0.13975	0.12675	0.1275	0.1225	0.1415	0.13125	0.14525	0.15275	0.14575
39:30:06	0.4955	0.47125	0.20925	0.2115	0.216	0.2225	0.2115	0.21075	0.26575	0.24925		39:30:06	0.403	0.437	0.18075	0.18525	0.213	0.2225	0.21075	0.2145	0.25775	0.28		39:30:06	0.43875	0.441	0.13625	0.13825	0.165	0.16875	0.154	0.17525	0.20325	0.1965		39:30:06	0.13625	0.143	0.128	0.1275	0.12275	0.147	0.13225	0.1475	0.155	0.14775
40:00:06	0.5005	0.47775	0.20875	0.212	0.216	0.22275	0.214	0.2105	0.2705	0.254		40:00:06	0.41025	0.443	0.1835	0.18725	0.2155	0.22325	0.21125	0.22025	0.2615	0.29125		40:00:06	0.4425	0.444	0.13775	0.14025	0.16675	0.17075	0.15275	0.17425	0.2005	0.1985		40:00:06	0.138	0.1435	0.128	0.12775	0.1265	0.1475	0.132	0.14925	0.154	0.1495
40:30:06	0.5035	0.4835	0.20975	0.212	0.21825	0.224	0.21175	0.2115	0.275	0.257		40:30:06	0.4165	0.44825	0.1875	0.1895	0.2185	0.224	0.213	0.22125	0.26775	0.296		40:30:06	0.4515	0.44525	0.14025	0.14325	0.16825	0.17075	0.15475	0.1735	0.20875	0.1995		40:30:06	0.14075	0.146	0.13175	0.1315	0.131	0.14725	0.135	0.14875	0.15525	0.14975
41:00:06	0.50525	0.488	0.21	0.2125	0.2195	0.2245	0.21225	0.2155	0.279	0.2675		41:00:06	0.4205	0.45075	0.186	0.1885	0.21775	0.22175	0.2135	0.2195	0.272	0.30325		41:00:06	0.4525	0.4485	0.14025	0.145	0.16925	0.172	0.15275	0.177	0.2085	0.2045		41:00:06	0.1415	0.147	0.13325	0.13375	0.13025	0.15	0.1345	0.153	0.15475	0.15275
41:30:06	0.51575	0.4925	0.2115	0.21225	0.22075	0.2255	0.21675	0.21225	0.28775	0.26725		41:30:06	0.4245	0.45775	0.18525	0.19225	0.219	0.22475	0.21425	0.2225	0.2765	0.30775		41:30:06	0.45725	0.45075	0.14225	0.145	0.1705	0.17225	0.1555	0.175	0.21675	0.20425		41:30:06	0.146	0.149	0.13475	0.134	0.133	0.15075	0.1365	0.15	0.1585	0.14975
42:00:06	0.517	0.496	0.2095	0.21375	0.218	0.22625	0.21875	0.2155	0.29625	0.27675		42:00:06	0.4245	0.46475	0.1825	0.1945	0.215	0.228	0.21225	0.2235	0.281	0.3165		42:00:06	0.4625	0.45125	0.14	0.1465	0.16975	0.1735	0.1555	0.17575	0.21725	0.207		42:00:06	0.1455	0.152	0.133	0.1355	0.13275	0.154	0.1365	0.15375	0.15825	0.15275
42:30:06	0.5215	0.50125	0.21275	0.21325	0.2195	0.22575	0.21825	0.2165	0.2975	0.2855		42:30:06	0.4275	0.4655	0.183	0.193	0.21675	0.2265	0.2135	0.2275	0.2875	0.3255		42:30:06	0.4635	0.4545	0.1425	0.14825	0.17125	0.174	0.15425	0.17675	0.22025	0.2095		42:30:06	0.1485	0.153	0.13475	0.135	0.1375	0.1525	0.138	0.15275	0.15775	0.153
43:00:06	0.52775	0.506	0.21125	0.2115	0.21975	0.22425	0.22125	0.216	0.306	0.2895		43:00:06	0.43475	0.4675	0.186	0.193	0.21925	0.2265	0.21475	0.22825	0.2915	0.331		43:00:06	0.47125	0.4605	0.14475	0.14875	0.17375	0.1755	0.1555	0.1765	0.221	0.21375		43:00:06	0.151	0.155	0.136	0.1365	0.139	0.1535	0.141	0.15275	0.15875	0.15325
43:30:06	0.52925	0.51325	0.2125	0.21325	0.221	0.227	0.223	0.217	0.31175	0.29375		43:30:06	0.43975	0.47775	0.18775	0.1955	0.21975	0.23075	0.217	0.2295	0.2985	0.336		43:30:06	0.4755	0.4645	0.14575	0.15	0.17425	0.17475	0.15575	0.1765	0.2245	0.2155		43:30:06	0.153	0.15725	0.14	0.139	0.141	0.157	0.141	0.15175	0.15975	0.15325
44:00:06	0.5395	0.51475	0.2115	0.21675	0.22125	0.2295	0.224	0.2175	0.3185	0.2995		44:00:06	0.44125	0.478	0.1845	0.19475	0.22	0.229	0.21575	0.2325	0.3	0.34625		44:00:06	0.4805	0.47025	0.147	0.15075	0.17375	0.17525	0.155	0.17575	0.22825	0.2185		44:00:06	0.15475	0.15925	0.14075	0.141	0.14125	0.1575	0.1415	0.1515	0.161	0.15325
44:30:06	0.541	0.52025	0.21225	0.21625	0.222	0.2295	0.2275	0.222	0.32525	0.31125		44:30:06	0.446	0.48375	0.1865	0.19425	0.221	0.229	0.21825	0.23275	0.30825	0.35275		44:30:06	0.48475	0.47075	0.14875	0.15125	0.175	0.1765	0.1575	0.1795	0.23575	0.22525		44:30:06	0.1585	0.16275	0.14175	0.14075	0.14275	0.15775	0.143	0.157	0.16225	0.15675
45:00:06	0.547	0.5265	0.2115	0.2165	0.221	0.23125	0.23175	0.22025	0.33575	0.31225		45:00:06	0.44875	0.4885	0.1825	0.19575	0.21725	0.23075	0.2165	0.236	0.31075	0.35975		45:00:06	0.4885	0.47575	0.14775	0.1515	0.17525	0.177	0.15775	0.18	0.241	0.22975		45:00:06	0.15975	0.16325	0.142	0.1425	0.145	0.1595	0.14475	0.15875	0.16425	0.158
45:30:06	0.55025	0.5305	0.21125	0.214	0.22175	0.228	0.23225	0.2205	0.3375	0.31925		45:30:06	0.452	0.4925	0.18575	0.19575	0.22075	0.23325	0.21775	0.2385	0.31675	0.36725		45:30:06	0.49225	0.48475	0.14875	0.15225	0.176	0.17825	0.156	0.17975	0.24075	0.23225		45:30:06	0.16275	0.166	0.1435	0.14425	0.14675	0.1595	0.1465	0.1585	0.16275	0.15875
46:00:06	0.55475	0.53575	0.21225	0.21625	0.22325	0.23075	0.23725	0.221	0.3455	0.32525		46:00:06	0.45725	0.4995	0.18525	0.1975	0.22125	0.23475	0.21875	0.2405	0.32075	0.374		46:00:06	0.49775	0.48875	0.14975	0.15325	0.17675	0.178	0.1565	0.17825	0.24525	0.2355		46:00:06	0.16575	0.1685	0.14375	0.148	0.1495	0.159	0.1465	0.156	0.1645	0.15725
46:30:06	0.55875	0.54075	0.2115	0.21525	0.222	0.23	0.23875	0.2245	0.35325	0.3335		46:30:06	0.45975	0.5015	0.185	0.1975	0.2215	0.23225	0.219	0.238	0.3245	0.374		46:30:06	0.5	0.49	0.15	0.15325	0.17675	0.17875	0.155	0.17875	0.25025	0.244		46:30:06	0.16625	0.171	0.147	0.15025	0.14975	0.1625	0.14475	0.1585	0.16325	0.158
47:00:06	0.564	0.54225	0.21125	0.2145	0.22175	0.228	0.24475	0.22475	0.35975	0.33825		47:00:06	0.46225	0.50475	0.18575	0.1965	0.22175	0.23325	0.22125	0.239	0.3345	0.37875		47:00:06	0.50525	0.49575	0.15125	0.15375	0.17625	0.17675	0.156	0.1795	0.25475	0.24625		47:00:06	0.16825	0.17225	0.14775	0.151	0.15075	0.1625	0.146	0.15575	0.16475	0.1555
47:30:06	0.567	0.5465	0.21175	0.21525	0.222	0.22975	0.2415	0.22525	0.36	0.34325		47:30:06	0.4635	0.506	0.18375	0.19525	0.21975	0.2315	0.22	0.2435	0.3365	0.39075		47:30:06	0.51025	0.49625	0.14875	0.1545	0.175	0.17725	0.15775	0.18	0.262	0.25425		47:30:06	0.16775	0.17475	0.1455	0.151	0.15075	0.162	0.1455	0.161	0.16625	0.161
48:00:06	0.56525	0.5525	0.2105	0.215	0.2205	0.23	0.24625	0.22775	0.36425	0.35175		48:00:06	0.46625	0.51325	0.18375	0.19725	0.21925	0.23425	0.2175	0.24325	0.3375	0.39175		48:00:06	0.511	0.4995	0.15125	0.15425	0.17475	0.17725	0.1555	0.1785	0.26375	0.2585		48:00:06	0.1725	0.179	0.14825	0.154	0.1515	0.16375	0.148	0.15975	0.1645	0.15925
