# Supplementary material for: Synergistic and antagonistic drug interactions in the treatment of systemic fungal infections
Source: eLife. 2020 May 5;9:e54160. doi: 10.7554/eLife.54160 (PMC7200157; doi:10.7554/eLife.54160)
Supplement: Figure 6—source data 2. — Colony forming units (CFUs) of C. neoformans after heat-killing cells in a water bath >65° C for about an hour. The starting concentration was 3 × 106 cells. [file elife-54160-fig6-data2.xlsx]

## Sheet: Sheet1
Source Data Table 13.
sample 1	234
sample 2	311
sample 3	1240
sample 4	1051
sample 5	0
sample 6	0
sample 7	323
sample 8	3296
sample 9	298
sample 10	2142
sample 11	387
sample 12	3112
sample 13	0
sample 14	0
sample 15	1444
sample 16	90
sample 17	705
sample 18	2120
