# Supplementary material for: Synergistic and antagonistic drug interactions in the treatment of systemic fungal infections
Source: eLife. 2020 May 5;9:e54160. doi: 10.7554/eLife.54160 (PMC7200157; doi:10.7554/eLife.54160)
Supplement: Supplementary file 1. — Small molecules predicted to interact with FLZ. Bioactivity and Status determined by Microsource Spectrum Library. The specific manufacturers we purchased molecules from are listed in last column. Molecules we did not purchase (for various reasons), have the manufacturer listed as N/A. INN, International Nonproprietary Names; USAN, United States Accepted Name; BAN, British Approved Names; JAN, Japanese Adopted Name; USP, United States Pharmacopeia; NF, National Formulary. [file elife-54160-supp1.xlsx]

## Sheet: Sheet1
Table S1.
Small Molecule	cas #	Bioactivity	Status	Assay Used	Manufacturer
1,3-Dideacetyldeoxykhivorin	N/A	N/A	Undetermined activity	not tested	N/A
1,3-Dideacetylkhivorin	N/A	N/A	Undetermined activity	not tested	N/A
12-Hydroxy-4,4-Bisnor-4,8,11,13-Podocarpatetraen-3-One	N/A	N/A	Undetermined activity	not tested	N/A
12-Methoxy-4,4-Bisnor-5alpha-8,11,13-Podocarpatrien-3-ol	N/A	N/A	Undetermined activity	not tested	N/A
14-Methoxy-4,4-Bisnor-8,11,13-Podocarpatrien-3-One	N/A	N/A	Undetermined activity	not tested	N/A
18alpha-Glycyrrhetinic Acid	N/A	antiinflammatory	Experimental	not tested	N/A
1-Hydroxy-3,6,7-trimethoxy-2,8-diprenylxanthone	15404-76-9	N/A	Undetermined activity	not tested	N/A
1-Methylxanthine	6136-37-4	diuretic, adenosine antagonist	Experimental	bliss independence	VWR
1-Monopalmitin	542-44-9	N/A	Undetermined activity	checkerboard	Sigma Chemical
1-Phenylbiguanide Hydrochloride	55-57-2	5HT3 receptor agonist	Experimental	bliss independence	Sigma Chemical
2',2'-Bisepigallocatechin Digallate	N/A	N/A	Undetermined activity	not tested	N/A
2,3,4'-Trihydroxy-4-Methoxybenzophenone	N/A	N/A	Undetermined activity	not tested	N/A
2',3-Dihydroxy-4,4',6'-Trimethoxychalcone	38186-71-9	N/A	Undetermined activity	not tested	N/A
2',4'-Dihydroxychalcone 4'-Glucoside	N/A	anthelmintic & antiulcerocenic	Experimental	not tested	N/A
21-Acetoxypregnenolone	566-78-9	precursor in corticoid biosynthesis, derivative	Undetermined activity	bliss independence	Santa Cruz
2-Hydroxy-3,4-Dimethoxybenzoic Acid	N/A	prostaglandin synthetase inhibitor	Experimental	checkerboard	Sigma Chemical
2-Methoxyresorcinol	29267-67-2	N/A	Undetermined activity	checkerboard	Santa Cruz
3,4'-Dihydroxyflavone	14919-49-4	N/A	Undetermined activity	checkerboard	Fisher Scientific
3',4'-Dihydroxyflavone	4143-64-0	N/A	Undetermined activity	checkerboard	Fisher Scientific
3,4-Dimethoxycinnamic acid	2316-26-9	N/A	Undetermined activity	checkerboard	Fisher Scientific
3,4-Dimethoxydalbergione	41043-20-3	induces dermatitis	Undetermined activity	not tested	N/A
3,7-Epoxycaryophyllan-6-One	N/A	N/A	Undetermined activity	not tested	N/A
3-Acetoxypregn-16-En-12,20-Dione	N/A	N/A	Undetermined activity	not tested	N/A
3alpha-Acetoxydihydrodeoxygedunin	N/A	N/A	Undetermined activity	not tested	N/A
3alpha-Hydroxy-4,4-Bisnor-8,11,13-Podocarpatriene	N/A	N/A	Undetermined activity	not tested	N/A
3-alpha-Hydroxydeoxygedinin	N/A	N/A	Undetermined activity	not tested	N/A
3-Amino-1,2,4-Triazole	61-82-5	catalase inhibitor	Experimental	checkerboard	Fisher Scientific
3-Amino-beta-Pinene	18172-67-3	N/A	Undetermined activity	checkerboard	Sigma Chemical
3beta-Chloroandrostanone	N/A	N/A	Undetermined activity	not tested	N/A
3-Bromo-7-Nitroindazole	74209-34-0	NO synthetase inhibitor	Experimental	checkerboard	Fisher Scientific
3-Deacetylkhivorin	N/A	N/A	Undetermined activity	not tested	N/A
3-Deoxo-3beta-Acetoxydeoxydihydrogedunin	N/A	N/A	Undetermined activity	not tested	N/A
3-Deoxo-3beta-Hydroxymexicanolide 16-Enol Ether	N/A	N/A	Undetermined activity	not tested	N/A
3-Hydroxytryramine	62-31-7	dopaminergic	Experimental	not tested	N/A
3-Methyl-1-Phenyl-2-Pyrazolin-5-One (MCI-186)	N/A	antioxidant, lipoxygenase inhibitor	Experimental	checkerboard	Santa Cruz
4'-Methoxychalcone	22966-19-4	N/A	Undetermined activity	checkerboard	VWR
5,7-Dichlorokynurenic Acid	190908-40-8	NMDA receptor antagonist (gly)	Experimental	bliss independence	Fisher Scientific
5beta-12-Methoxy-4,4-Bisnor-8,11,13-Podocarpatrien-3-One	N/A	N/A	Undetermined activity	not tested	N/A
5-Fluoroindole-2-Carboxylic Acid	399-76-8	NMDA receptor antagonist (gly)	Experimental	Not tested	N/A
5-Hydroxyiminoisocaryophyllene	N/A	N/A	Undetermined activity	not tested	N/A
6alpha-Methylprednisolone Acetate	N/A	glucocorticoid	Experimental	not tested	N/A
7,8-Dihydroxyflavone	38183-03-8	vascular protectant, antihaemorrhagic	Experimental	bliss independence	Santa Cruz
7-Deacetoxy-7-Oxokhivorin	15004-51-0	N/A	Undetermined activity	not tested	N/A
7-Desacetoxy-6,7-Dehydrogedunin	26927-01-5	N/A	Undetermined activity	checkerboard	Sigma Chemical
8-Cyclopentyltheophylline	35873-49-5	A1 adenosine agonist	Experimental	bliss independence	Fisher Scientific
8-Hydroxy-15,16-Bisnor-11-labden-13-One	N/A	N/A	Undetermined activity	not tested	N/A
8-Hydroxycarapinic Acid	N/A	N/A	Undetermined activity	not tested	N/A
8-Iodocatechin Tetramethyl Ether	N/A	N/A	Undetermined activity	not tested	N/A
Acadesine	2627-69-2	glucose uptake stimulant; AMPK activator	Experimental	bliss independence	Cayman Chemicals
Acamprosate Calcium	77337-73-6	alcohol antagonist	USAN, INN, BAN	checkerboard	Fisher Scientific
Acetyltryptophan	1218-34-4	antidepressant	Experimental	checkerboard	Fisher Scientific
Aconitic Acid	585-84-2	N/A	Undetermined activity	checkerboard	Fisher Scientific
Adrenaline Bitartrate	51-42-3	adrenergic agonist, bronchodilator, antiglaucoma agent	USP, JAN	checkerboard	Fisher Scientific
Aliskiren Hemifumarate	173334-57-1	renin inhibitor	USAN, INN	bliss independence	VWR
Allopurinol	315-30-0	antihyperuricemia, antigout, antiurolithic	USP, INN, BAN, JAN	bliss independence	Fisher Scientific
Aloin	5133-19-7	cathartic, laxative	BAN	checkerboard	Cayman Chemicals
Aminohydroxybutyric Acid	924-49-2	antiepileptic	JAN	bliss independence	Santa Cruz
Amiodarone Hydrochloride	1951-25-3	adrenergic agonist, coronary vasodilator, Ca channel blocker	USAN, INN, BAN, JAN	checkerboard	Fisher Scientific
Amprolium	121-25-5	coccidiostat	USP, INN, BAN	bliss independence	VWR
Anabasine Hydrochloride	13078-04-1	insecticide	agricultural use	not tested	N/A
Ancitabine Hydrochloride	10212-25-6	antineoplastic	INN, JAN	checkerboard	Santa Cruz
Andrographolide	5508-58-7	N/A	Undetermined activity	bliss independence	Cayman Chemicals
Androsta-1,4-Dien-3,17-Dione	897-06-3	N/A	Undetermined activity	not tested	N/A
Angolensic Acid, Methyl Ester	2629-14-3	N/A	Undetermined activity	not tested	N/A
Anhydrobrazilic Acid	N/A	N/A	Undetermined activity	not tested	N/A
Anthothecol	10410-83-0	N/A	Undetermined activity	not tested	N/A
Anthracene-9-Carboxylic Acid	723-62-6	Cl transport inhibitor	Experimental	checkerboard	Fisher Scientific
Aphyllic Acid	642-67-1	N/A	Undetermined activity	not tested	N/A
Apiin	26544-34-3	N/A	Undetermined activity	bliss independence	Santa Cruz
Artenimol	81496-81-3	antimalarial, antiinflammatory	INN	checkerboard	Sigma Chemical
Arthonioic Acid	25556-24-5	N/A	Undetermined activity	not tested	N/A
Asiatic acid	464-92-6	wound healing, Experimental carcinogen	Experimental	checkerboard	Sigma Chemical
Astaxanthin	71772-51-5	N/A	Undetermined activity	checkerboard	Cayman Chemicals
Atractyloside Potassium	17754-44-8	oxidative phosphorylation inhibitor	Experimental	not tested	N/A
Avocadyne	34524-38-4	antibacterial, antifungal	Experimental	not tested	N/A
Bambuterol Hydrochloride	81732-46-9	beta adrenergic agonist, bronchodilator, cholinesterase inhibitor	INN, BAN	bliss independence	Cayman Chemicals
Batyl Alcohol	544-62-7	N/A	Undetermined activity	not tested	N/A
Benzalkonium Chloride	8001-54-5	antiinfective (topical)	USAN, NF, INN, BAN, JAN	checkerboard	VWR
Berbamine Hydrochloride	114784-59-7	antihypertensive, skeletal muscle relaxant	Experimental	checkerboard	Cayman Chemicals
Berberine Chloride	633-65-8	antiarrhythmic, alpha2 agonist, cholinesterase, anticonvulsant, antiinflammatory, antibacterial, antifungal, antitrypanosomal, antineoplastic, immunostimulant	JAN	checkerboard	Cayman Chemicals
Bergapten	484-20-8	antipsoriatic, antiinflammatory	INN	checkerboard	Santa Cruz
beta-Dihydrogedunol	N/A	N/A	Undetermined activity	not tested	N/A
beta-Escin	6805-41-0	membrane permeabilizer	INN	checkerboard	Fisher Scientific
beta-Peltatin	518-29-6	antineoplastic, cytotoxic	Experimental	not tested	N/A
Beta-Propiolactone	57-57-8	antiinfective	USAN, INN	not tested	N/A
Betonicine	515-25-3	N/A	Undetermined activity	checkerboard	Santa Cruz
Betulin	473-98-3	N/A	Undetermined activity	bliss independence	Cayman Chemicals
Bicuculline (+)	485-49-4	GABAa antagonist	Experimental	checkerboard	Cayman Chemicals
Biochanin A	491-80-5	phytoestrogen	Experimental	checkerboard	Cayman Chemicals
Biochanin A Diacetate	N/A	N/A	Undetermined activity	not tested	N/A
Bisabolol Acetate	N/A	N/A	Undetermined activity	not tested	N/A
Bismuth Subsalicylate	14882-18-9	antidiarrheal, antacid, antiulcer	USP, JAN	checkerboard	Santa Cruz
Blasticidin S	2079-00-7	antibiotic, antifungal; LD50 (rat po) 16mg/kg	agricultural use	checkerboard	ThermoFisher
Bleomycin	9041-93-4	antineoplastic	USP, INN, BAN, JAN	checkerboard	VWR
Bromhexine Hydrochloride	611-75-6	expectorant	USAN, INN, BAN, JAN	checkerboard	VWR
Bromo-3-Hydroxy-4-(Succin-2-YL)-Caryolane gamma-Lactone	N/A	N/A	Undetermined activity	not tested	N/A
Bucladesine	362-74-3	vasodilator	INN, JAN	bliss independence	Cayman Chemicals
Bussein	41060-14-4	N/A	Undetermined activity	not tested	N/A
Cadaverine Tartrate	462-94-2	N/A	Undetermined activity	checkerboard	Santa Cruz
Calcein	1461-15-0	chelating agent (Ca, Mg)	Experimental	checkerboard	Cayman Chemicals
Caperatic Acid	29227-64-3	antibacterial (tuberculostatic)	Undetermined activity	not tested	N/A
Capobenic Acid	21434-91-3	antiarrhythmic	USAN, INN	not tested	N/A
Carbimazole	22232-54-8	antithyroid	INN, BAN	checkerboard	Santa Cruz
Caryophyllene [t(-)]	87-44-5	N/A	Undetermined activity	checkerboard	VWR
Cearoin	52811-37-7	N/A	Undetermined activity	not tested	N/A
Celastrol	34157-83-0	antineoplastic, antiinflamatory, NO synthesis inhibitor, chaperone stimulant	Experimental	checkerboard	Cayman Chemicals
Cevadine	62-59-9	antihypertensive	Experimental	not tested	Fisher Scientific
Chaulmoogric Acid, Ethyl ester	623-32-5	antilepretic	Experimental	not tested	N/A
Chloroguanide Hydrochloride	637-32-1	antimalarial	USP-XIV, INN, BAN	checkerboard	Sigma Chemical
Chlorotrianisene	569-57-3	estrogen	USP-XIII, INN, BAN	not tested	N/A
Chloroxine	773-76-2	chelating agent	USAN	checkerboard	Fisher Scientific
Chlorzoxazone	95-25-0	muscle relaxant (skeletal)	USP, INN, BAN, JAN	checkerboard	VWR
Cholic Acid	81-25-4	N/A	Undetermined activity	checkerboard	no interaction
Cimcifugoside H1	N/A	N/A	Undetermined activity	not tested	N/A
Cimcifugoside H2	161097-77-4	N/A	Undetermined activity	not tested	N/A
Citrulline	627-77-0	N/A	Undetermined activity	bliss independence	Fisher Scientific
Clomipramine Hydrochloride	17321-77-6	antidepressant	USP, INN, BAN, JAN	checkerboard	Fisher Scientific
Clovanediol Diacetate	N/A	N/A	Undetermined activity	not tested	N/A
Colistin Sulfate	1264-72-8	antibacterial	USP, INN, BAN, JAN	checkerboard	Cayman Chemicals
Convallatoxin	508-75-8	cardiotonic	Experimental	checkerboard	Sigma Chemical
Cortisone	53-06-5	antiinflammatory, glucocorticoid	INN, BAN	checkerboard	Sigma Chemical
Cotinine	486-56-6	antidepressant	Experimental	checkerboard	Fisher Scientific
Cresol	1319-77-3	antiinfectant	USAN, NF, JAN	checkerboard	VWR
Crinamine	639-41-8	antihypertensive, respiratory depressant, antineoplastic	Experimental	not tested	N/A
Cuneatin Methyl Ether	4253-00-3	N/A	Undetermined activity	not tested	N/A
Cycloveratrylene	N/A	N/A	Undetermined activity	not tested	N/A
Cytisine	485-35-8	antiinflammatory, respiratory stimulent	INN	bliss independence	Fisher Scientific
Dapsone	80-08-0	antibacterial, leprostatic, dermatitis herpetiformis suppressant	USP, INN, BAN	checkerboard	Sigma Chemical
Daunorubicin	20830-81-3	antineoplastic	USAN, INN, BAN, JAN	checkerboard	Santa Cruz
Decoquinate	18507-89-6	coccidiostat	USP, INN, BAN	bliss independence	VWR
Dehydro(11,12)Ursolic Acid Lactone	N/A	N/A	Undetermined activity	not tested	N/A
Dehydroepiandrosterone	53-43-0	N/A	Undetermined activity	checkerboard	Cayman Chemicals
Demethylnobiletin	2174-59-6	N/A	Undetermined activity	not tested	N/A
Derrusnin	14736-62-0	N/A	Undetermined activity	not tested	N/A
Desipramine Hydrochloride	58-28-6	antidepressant	USP, INN, BAN, JAN	checkerboard	Sigma Chemical
Dexpanthenol	81-13-0	cholinergic	USP, INN, BAN	checkerboard	VWR
Diallyl Sulfide	592-88-1	antibacterial, antifungal, antineoplastic, antihypercholesterolaemic,hepatoprotectant	Experimental	checkerboard	Fisher Scientific
Dictamnine	484-29-7	N/A	Undetermined activity	not tested	N/A
Dicyclomine Hydrochloride	67-92-5	anticholinergic	USP, INN, BAN, JAN	checkerboard	Sigma Chemical
Difucol Hexamethyl Ether	14262-07-8	N/A	Undetermined activity	not tested	N/A
Digitonin	11024-24-1	N/A	Undetermined activity	checkerboard	Cayman Chemicals
Digitoxin	71-63-6	inotropic, cardiotonic	USP, INN, BAN, JAN	bliss independence	Santa Cruz
Dihydroergotamine Mesylate	6190-39-2	vasoconstrictor, antimigraine	USP, INN, BAN, JAN	checkerboard	VWR
Dihydrofissinolide	N/A	N/A	Undetermined activity	not tested	N/A
Dihydrogambogic Acid	N/A	N/A	Undetermined activity	not tested	N/A
Dihydrogedunin	N/A	N/A	Undetermined activity	not tested	N/A
Dihydrojasmonic Acid	98674-52-3	plant growth regulator	Experimental	checkerboard	Sigma Chemical
Dihydromyristicin	607-91-0	GSH transferase inducer	Experimental	checkerboard	Cayman Chemicals
Dihydrorotenone	N/A	N/A	Undetermined activity	not tested	N/A
Dimethylcaffeic Acid	14737-89-4	N/A	Undetermined activity	not tested	N/A
Dimethylsulfone	67-71-0	antiinflammatory, antiproliferative, antiparasitic	agricultural use	bliss independence	Cayman Chemicals
Diphenhydramine Hydrochloride	147-24-0	antihistaminic	USP, INN, BAN, JAN	checkerboard	Fisher Scientific
Disulfram	97-77-8	alcohol antagonist	USP, INN, BAN, JAN	checkerboard	VWR
Dopamine Hydrochloride	62-31-7	cardiotonic, antihypotensive	USP, INN, BAN, JAN	bliss independence	VWR
Ebselen	60940-34-3	antioxidant, lipoxygenase inhibitor, inhibits oxidation of LDL	INN	checkerboard	Cayman Chemicals
Embelin	N/A	anthelmintic, oral contraceptive	Experimental	bliss independence	Cayman Chemicals
Emodic Acid	578-45-5	cathartic, purgative	Experimental	not tested	N/A
Epiandrosterone	N/A	N/A	Undetermined activity	checkerboard	Fisher Scientific
Epicatechin Pentaacetate	N/A	N/A	Undetermined activity	not tested	N/A
Epitheaflavin Monogallate	N/A	N/A	Undetermined activity	not tested	N/A
Epoxygedunin	N/A	N/A	Undetermined activity	not tested	N/A
Ergosterol	57-87-4	N/A	Undetermined activity	bliss independence	Cayman Chemicals
Estradiol Benzoate	50-50-0	estrogen	USP-XX, INN, BAN, JAN		Santa Cruz
Estriol	50-27-1	estrogen	USP, INN, BAN, JAN	checkerboard	Fisher Scientific
Estrone	53-16-7	estrogen	USP, INN, BAN	checkerboard	Fisher Scientific
Etanidazole	22668-01-6	antineoplastic, hypoxic cell radiosensitizer	USAN, INN	not tested	N/A
Ethacrynic Acid	58-54-8	diuretic	USP, INN, BAN, JAN	checkerboard	Fisher Scientific
Eucatropine Hydrochloride	536-93-6	anticholinergic (opthalmic)	USP, INN, BAN	not tested	N/A
Eugenol	97-53-0	analgesic (topical), antiseptic, antifungal	USP	checkerboard	Fisher Scientific
Euphorbiasteroid	28649-59-4	N/A	Undetermined activity	not tested	N/A
Filipin	480-49-9	antifungal	USAN, INN	checkerboard	Sigma Chemical
Fludrocortisone Acetate	514-36-3	mineralocorticoid	USP, INN, BAN, JAN	checkerboard	Sigma Chemical
Fluocinolone Acetonide	67-73-2	glucocorticoid, antiinflammatory	USP, INN, BAN, JAN	checkerboard	Fisher Scientific
Flurothyl	333-36-8	central stimulant, convulsant	USP-XXI, INN, BAN		VWR
Fumarprotocetraric Acid	489-50-9	N/A	Undetermined activity	not tested	N/A
Gallamine Triethiodide	65-29-2	muscle relaxant (skeletal)	USP, INN	checkerboard	Santa Cruz
Gemfibrozil	25812-30-0	antihyperlipoproteinemic	USP, INN, BAN	checkerboard	VWR
Gentisic Acid	490-79-9	analgesic, antiinflammatory	Experimental	checkerboard	Fisher Scientific
Geraldol	21511-25-1	N/A	Undetermined activity	not tested	N/A
Glucitol-4-Gucopyanoside	N/A	N/A	Undetermined activity	not tested	N/A
Glucosaminic Acid	N/A	N/A	Undetermined activity	bliss independence	Fisher Scientific
Glyburide	10238-21-8	antihyperglycemic	USP, INN, BAN, JAN	checkerboard	VWR
Gossypetin	489-35-0	N/A	Undetermined activity	checkerboard	Fisher Scientific
Guaiazulene	49-84-9	antioxidant, inhibits lipid peroxidation inhibitor, antiinflammatory, hepatoprotectant; LD50(rat) 1550 mg/kg po	Experimental	checkerboard	VWR
Guaiol(-)	489-86-1	N/A	Undetermined activity	bliss independence	Sigma Chemical
Haematommic Acid	479-25-4	N/A	Undetermined activity	not tested	N/A
Harmalol Hydrochloride	6028-07-5	anthelmintic, narcotic agent	Experimental	bliss independence	VWR
Harmane	486-84-0	intercalating agent, sedative	Experimental	checkerboard	Santa Cruz
Hastatoside	50816-24-5	N/A	Undetermined activity	not tested	N/A
Hecogenin	467-55-0	antiinflammatory	Experimental	bliss independence	VWR
Hematein	475-25-2	N/A	Undetermined activity	not tested	N/A
Heptaminol Hydrochloride	543-15-7	vasodilator	INN, BAN	checkerboard	Sigma Chemical
Hetacillin Potassium	5321-32-4	antibacterial	USP-XIII, JAN	not tested	N/A
Hexetidine	141-94-6	antifungal	BAN	checkerboard	Santa Cruz
Hexylresorcinol	136-77-6	anthelmintic, topical antiseptic	USP, BAN	checkerboard	VWR
Huperzine A	102518-79-6	anticholinesterase, cognition enhancer	Experimental	bliss independence	Cayman Chemicals
Hydrocortisone Hemisuccinate	125-04-2	glucocorticoid	USP, JAN	bliss independence	Santa Cruz
Hydrocortisone Phosphate Triethylamine	3863-59-0	glucocorticoid	USP, INN, BAN, JAN	bliss independence	Fisher Scientific
Hypoxanthine	68-94-0	N/A	Undetermined activity	checkerboard	VWR
Inosine	58-63-9	cell function activator, cardiotonic	INN, JAN	checkerboard	VWR
Inositol	87-89-8	growth factor	NF-XII	checkerboard	Fisher Scientific
Iretol	N/A	N/A	Undetermined activity	not tested	N/A
Isopeonol	493-33-4	N/A	Undetermined activity	not tested	N/A
Isotectorigenin, 7-Methyl Ether	N/A	N/A	Undetermined activity	not tested	N/A
Ivermectin	70288-86-7	antiparasitic	USP, INN, BAN	checkerboard	VWR
Ketoconazole	65277-42-1	antifungal	USP, INN, BAN, JAN	checkerboard	Fisher Scientific
Khayanthone	25279-68-9	N/A	Undetermined activity	not tested	N/A
Khellin	82-02-0	vasodilator	INN	checkerboard	Fisher Scientific
Khivorin	2524-38-1	N/A	Undetermined activity	not tested	N/A
Koparin	65048-75-1	N/A	Undetermined activity	not tested	N/A
L(+/-)-Alliin	556-27-4	antibacterial, antioxidant	Experimental	checkerboard	Sigma Chemical
Lanosterol	79-63-0	N/A	Undetermined activity	checkerboard	Cayman Chemicals
Lapachol	84-79-7	antineoplastic, antifungal	Experimental	checkerboard	Santa Cruz
Lappaconitine	32854-75-4	analgesic, antiarrhythmic	Experimental	bliss independence	Santa Cruz
Larixinic Acid	118-71-8	N/A	Undetermined activity	checkerboard	Fisher Scientific
L-Deoxyalliin	21593-77-1	antineoplastic	Experimental	bliss independence	VWR
Leoidin Dimethyl Ether	N/A	N/A	Undetermined activity	not tested	N/A
Levalbuterol Hydrochloride	50293-90-8	bronchodilator, tocolytic	USAN	bliss independence	Santa Cruz
Linalool (+)	N/A	N/A	Undetermined activity	checkerboard	Sigma Chemical
Loganin	18524-94-2	N/A	Undetermined activity	checkerboard	Cayman Chemicals
Lupanyl Acid Hydrochloride	N/A	N/A	Undetermined activity	not tested	N/A
Lycopodine Perchlorate	N/A	N/A	Undetermined activity	not tested	N/A
Mangiferin	4773-96-0	MAO inhibitor, immunostimulant	Experimental	bliss independence	Fisher Scientific
Marmesin Acetate	N/A	N/A	Undetermined activity	not tested	N/A
Mebeverine Hydrochloride	2753-45-9	muscle relaxant (smooth)	USAN, INN, BAN	checkerboard	Santa Cruz
Melezitose	N/A	N/A	Undetermined activity	bliss independence	Fisher Scientific
Metameconine	N/A	N/A	Undetermined activity	not tested	N/A
Metergoline	17692-51-2	analgesic, antipyretic	INN, BAN	checkerboard	Santa Cruz
Metformin Hydrochloride	1115-70-4	antidiabetic	USAN, JAN	bliss independence	VWR
Methimazole	60-56-0	antihyperthyroid	USP, INN, BAN, JAN	checkerboard	Fisher Scientific
Methyl Robustone	N/A	N/A	Undetermined activity	not tested	N/A
Methylxanthoxylin	23121-32-6	N/A	Undetermined activity	not tested	N/A
Mexicanolide	1915-67-9	N/A	Undetermined activity	not tested	N/A
Morin	480-16-0	P450 and ATPase inhibitor	Experimental	bliss independence	Fisher Scientific
Mudulone	481-94-7	N/A	Undetermined activity	not tested	N/A
Nafcillin Sodium	985-16-0	antibacterial	USP, INN, BAN	checkerboard	VWR
N-Benzyltropan-4-ol	N/A	N/A	Undetermined activity	not tested	N/A
Nerol	106-25-2	weak estrogen receptor blocker	Experimental	checkerboard	Fisher Scientific
N-Methylanthranilic Acid	119-68-6	N/A	Undetermined activity	checkerboard	Fisher Scientific
N-Methylisoleucine	5125-98-8	N/A	Undetermined activity	not tested	N/A
Nonic Acid	N/A	N/A	Undetermined activity	not tested	N/A
Nonoxynol-9	26027-38-3	spermatocide, contraceptive	USP, INN	checkerboard	Santa Cruz
Obliquin	N/A	N/A	Undetermined activity	not tested	N/A
Octopamine Hydrochloride	104-14-3	adrenergic agonist	INN	checkerboard	Cayman Chemicals
Oleanolic Acid Acetate	4339-72-4	N/A	Undetermined activity	not tested	N/A
Orsellinic Acid, Ethyl Ester	2524-37-0	N/A	Undetermined activity	checkerboard	Santa Cruz
Osthol	484-12-8	N/A	Undetermined activity	checkerboard	Cayman Chemicals
o-Veratraldehyde	86-51-1	N/A	Undetermined activity	not tested	N/A
Oxolinic Acid	14698-29-4	antibacterial	USAN, INN, BAN	bliss independence	Fisher Scientific
Pachyrrhizin	10091-01-7	insecticide	Experimental	not tested	N/A
Paeonol	552-41-0	antibacterial	Experimental	checkerboard	Cayman Chemicals
Pamabrom	606-04-2	diuretic	USP	bliss independence	VWR
Pectolinarin	28978-02-1	N/A	Undetermined activity	checkerboard	Sigma Chemical
Pelletierine Hydrochloride	N/A	N/A	Undetermined activity	not tested	N/A
Peonol Methyl Ether	829-20-9	N/A	Undetermined activity	not tested	N/A
Phenacylamine Hydrochloride	5468-37-1	N/A	Undetermined activity	checkerboard	Fisher Scientific
Phenylbutyric Acid	1821-12-1	antiinflammatory, antihyperammonemic (Na salt)	Experimental	checkerboard	Fisher Scientific
Phloridzin	60-81-1	induces experimental glucosuria, antifeedant	Experimental	bliss independence	Cayman Chemicals
Picropodophyllotoxin	477-47-4	antineoplastic; 10% cytotoxicity of podophyllotoxin	Experimental	bliss independence	Sigma Chemical
Picropodophyllotoxin Acetate	N/A	N/A	Undetermined activity	not tested	N/A
Pinacidil	85371-64-8	K channel agonist, antihypertensive	USAN, INN	not tested	Santa Cruz
Piplartine	20069-09-4	anti-asthma, antibronchitis	Experimental	checkerboard	Cayman Chemicals
Podototarin	N/A	N/A	Undetermined activity	not tested	N/A
Primaquine Diphosphate	63-45-6	antimalarial	USP, INN, BAN	checkerboard	Santa Cruz
Protoveratrine B	124-97-0	antihypertensive, emetic; LD50(mouse) 0.21 mg/kg sc	INN	not tested	N/A
Pteryxin	13161-75-6	muscle relaxant	Experimental	not tested	N/A
Punctaporonin B	93697-36-0	N/A	Undetermined activity	not tested	N/A
Purpurogallin	569-77-7	xanthine oxidase inhibitor, antioxidant	Experimental	not tested	N/A
Putrescine Dihydrochloride	333-93-7	ornithine decarboxylase inhibitor, cell growth factor	Experimental	bliss independence	Santa Cruz
Pyrithyldione	77-04-3	hypnotic, sedative	INN	bliss independence	Sigma Chemical
Quebrachitol	642-38-6	N/A	Undetermined activity	bliss independence	Santa Cruz
Rabeprazole Sodium	117976-90-6	gastric acid secretion inhibitor, cell growth factor	USAN, INN, BAN	checkerboard	VWR
Resveratrol	501-36-0	antifungal, antibacterial	Experimental	bliss independence	VWR
Rhetsinine	526-43-2	N/A	Undetermined activity	not tested	N/A
Rhodinyl Acetate	N/A	N/A	Undetermined activity	not tested	N/A
Rhodocladonic Acid	26984-15-6	N/A	Undetermined activity	not tested	N/A
Ribostamycin Sulfate	25546-65-0	antibacterial	INN, BAN, JAN	checkerboard	Santa Cruz
Risedronate Sodium Hydrate	115436-72-1	calcium regulator	USAN	bliss independence	Santa Cruz
Rotenone	83-79-4	acaricide, ectoparasiticide, antineoplastic, mitochondrial poison	agricultural use	checkerboard	Cayman Chemicals
Safrole	9-59-7	anesthetic (topical) and antiseptic, pediculicide	Experimental	checkerboard	Sigma Chemical
Salsolidine	493-48-1	antihypertensive	Experimental	bliss independence	Santa Cruz
Salsoline	89-31-6	antihypertensive, antihistamine	Experimental	not tested	N/A
Sappanone A Trimethyl Ether	N/A	N/A	Undetermined activity	not tested	N/A
Scopoletin	92-61-5	NO synthesis (inducible) inhibitor, anticoagulant	Experimental	checkerboard	VWR
Sertraline Hydrochloride	79559-97-0	antidepressant, 5HT uptake inhibitor	USAN, INN, BAN	checkerboard	VWR
Smilagenin	126-18-1	N/A	Undetermined activity	not tested	N/A
Solidagenone	23534-56-7	N/A	Undetermined activity	not tested	N/A
Spermidine Trihydrochloride	334-50-9	ornithine decarboxylase inhibitor	Experimental	bliss independence	Fisher Scientific
Succinylacetone	51568-18-4	inhibitor of heme biosynthesis	Experimental	checkerboard	Sigma Chemical
Sulfamethizole	144-82-1	antibacterial	USP, INN, BAN, JAN	checkerboard	Sigma Chemical
Tanshinone IIA Sulfonate Sodium	568-72-9	free radical scavenger	Experimental	checkerboard	Cayman Chemicals
Terazosin Hydrochloride	70024-40-7	antihypertensive	USP, INN, BAN, JAN	bliss independence	Fisher Scientific
Thermopsine perchlorate	486-90-8	N/A	Undetermined activity	not tested	N/A
Tilorone	27591-69-1	antiviral	USAN, INN	bliss independence	VWR
Tolfenamic Acid	13710-19-5	antiinflammatory, analgesia	INN, BAN, JAN	checkerboard	Cayman Chemicals
Toremiphene Citrate	89778-27-8	antineoplastic, anti-estrogen	USAN, INN, BAN	checkerboard	Santa Cruz
Totarol-19-Carboxylic Acid, Methyl Ester	N/A	N/A	Undetermined activity	not tested	N/A
Tubocurarine Chloride	6989-98-6	muscle relaxant (skeletal)	USP, INN, BAN, JAN	bliss independence	Santa Cruz
Tulobuterol	41570-61-0	bronchodilator, beta adrenergic agonist	INN, BAN, JAN	checkerboard	VWR
Tylosin Tartrate	1405-54-5	antibacterial	USP, INN, BAN	checkerboard	VWR
Tyramine	51-67-2	adrenergic agonist	Experimental	checkerboard	Cayman Chemicals
Uncarine E	5171-37-9	N/A	Undetermined activity	not tested	N/A
Ursinoic Acid	30265-59-9	N/A	Undetermined activity	not tested	N/A
Ursocholanic Acid	546-18-9	N/A	Undetermined activity	checkerboard	Santa Cruz
Usnic Acid	125-46-2	antibacterial	Experimental	checkerboard	Santa Cruz
Utilin	31218-22-1	N/A	Undetermined activity	not tested	N/A
Valacyclovir Hydrochloride	124832-27-5	antiviral	USAN, INN, BAN	bliss independence	Fisher Scientific
Veratrine Sulfate	62-59-9	antihypertensive	Experimental	bliss independence	Sigma Chemical
Vincamine	1617-90-9	vasodilator	INN, BAN	checkerboard	Cayman Chemicals
Vindoline	2182-14-1	CNS stimulant/depressant; antihyperglycaemic	Experimental	checkerboard	Santa Cruz
Xylocarpus A	N/A	N/A	Undetermined activity	not tested	N/A
Xylomethazoline Hydrochloride	1218-35-5	adrenergic agonist, nasal decongestant	USP, INN, BAN	checkerboard	VWR
Zolpidem	82626-48-0	sedative, hypnotic	USAN, INN, BAN	bliss independence	Fisher Scientific
