# Supplementary material for: Synergistic and antagonistic drug interactions in the treatment of systemic fungal infections
Source: eLife. 2020 May 5;9:e54160. doi: 10.7554/eLife.54160 (PMC7200157; doi:10.7554/eLife.54160)
Supplement: Supplementary file 2. — Small molecules predicted to interact with FLZ but had no interaction. Minimum inhibitory concentration for 50% inhibition (MIC 50) and 90% inhibition (MIC 90) of small molecules predicted to interact with FLZ but resulted in no interaction. All values are against C. neoformans strain CM18. Bioactivity determined by Microsource Spectrum Library. [file elife-54160-supp2.xlsx]

## Sheet: Sheet1
Table S2.
Small Molecule	Bioactivity	MIC 50	MIC 90	Result
1-Monopalmitin	N/A	2.40 mM	N/A	no interaction
2-Hydroxy-3,4-Dimethoxybenzoic Acid	prostaglandin synthetase inhibitor	2.32 mM	4.64 mM	no interaction
2-Methoxyresorcinol	N/A	14.8 mM	N/A	no interaction
3,4-Dimethoxycinnamic Acid	N/A	0.394 mM	7.89 mM	no interaction
3-Amino-1,2,4-Triazole	catalase inhibitor	21.5 mM	43.1 mM	no interaction
3-Bromo-7-Nitroindazole	NO synthetase inhibitor	7.11 mM	14.2 mM	no interaction
3-Methyl-1-Phenyl-2-Pyrazolin-5-One (MCI-186)	antioxidant, lipoxygenase inhibitor	0.408 mM	1.86 mM	no interaction
7-Desacetoxy-6,7-Dehydrogedunin	N/A	0.563 mM	1.13 mM	no interaction
Acamprosate Calcium	alcohol antagonist	5.94 mM	N/A	no interaction
Acetyltryptophan	antidepressant	9.83 mM	N/A	no interaction
Aconitic Acid	N/A	N/A	9.94 mM	no interaction
Adrenaline Bitartrate	adrenergic agonist, bronchodilator, antiglaucoma agent	5.25 mM	N/A	no interaction
Aloin	cathartic, laxative	4.94 mM	N/A	no interaction
Ancitabine Hydrochloride	antineoplastic	4.97 mM	N/A	no interaction
Artenimol	antimalarial, antiinflammatory	0.682 µM	N/A	no interaction
Asiatic Acid	wound healing, Experimental carcinogen	N/A	18.4 µM	no interaction
Astaxanthin	N/A	2.00 mM	N/A	no interaction
beta-Escin	membrane permeabilizer	0.946 mM	N/A	no interaction
Betonicine	N/A	3.13 mM	N/A	no interaction
Bicuculline	GABAa antagonist	N/A	3.54 mM	no interaction
Biochanin A	phytoestrogen	5.54 mM	N/A	no interaction
Bleomycin	antineoplastic	0.952 µM	2.33 µM	no interaction
Calcein	chelating agent (Ca, Mg)	0.765 mM	N/A	no interaction
Caryophyllene	N/A	0.4 M	N/A	no interaction
Chlorzoxazone	muscle relaxant (skeletal)	N/A	1.30 mM	no interaction
Cholic Acid	N/A	1.07 mM	1.93 mM	no interaction
Colistin Sulfate	antibacterial	N/A	0.167 mM	no interaction
Convallatoxin	cardiotonic	10.7 mM	N/A	no interaction
Cortisone	antiinflammatory, glucocorticoid	3.12 mM	6.24 mM	no interaction
Cotinine	antidepressant	33.8 mM	67.5 mM	no interaction
Cresol	antiinfectant	0.775 mM	4.02 mM	no interaction
Daunorubicin	antineoplastic	N/A	3.52 mM	no interaction
Dexpanthenol	cholinergic	0.135 M	N/A	no interaction
Digitonin	N/A	N/A	5.86 µM	no interaction
Dihydroergotamine Mesylate	vasoconstrictor, antimigraine	N/A	0.937 mM	no interaction
Dihydrojasmonic Acid	plant growth regulator	14.6 mM	58.3 mM	no interaction
Ebselen	antioxidant, lipoxygenase inhibitor, inhibits oxidation of LDL	N/A	3.03 µM	no interaction
Estrone	estrogen	N/A	5.30 mM	no interaction
Filipin	antifungal	N/A	11.9 mM	no interaction
Fludrocortisone Acetate	mineralocorticoid	2.46 mM	7.35 mM	no interaction
Gallamine Triethiodide	muscle relaxant (skeletal)	1.45 mM	N/A	no interaction
Gemfibrozil	antihyperlipoproteinemic	1.87 mM	6.16 mM	no interaction
Gentisic Acid	analgesic, antiinflammatory	N/A	11.7 mM	no interaction
Harmane	intercalating agent, sedative	N/A	1.33 mM	no interaction
Hexylresorcinol	anthelmintic, topical antiseptic	36.8 µM	59.8 µM	no interaction
Hypoxanthine	N/A	N/A	11.0 mM	no interaction
Inosine	cell function activator, cardiotonic	29.1 mM	N/A	no interaction
Inositol	growth factor	3.87 mM	7.49 mM	no interaction
Ketoconazole	antifungal	N/A	4.04 µM	no interaction
Khellin	vasodilator	0.865 mM	2.31 mM	no interaction
L(+/-)-Alliin	antibacterial, antioxidant	1.79 mM	N/A	no interaction
Lanosterol	N/A	0.445 mM	N/A	no interaction
Larixinic Acid	N/A	3.58 mM	7.18 mM	no interaction
Loganin	N/A	2.67 mM	N/A	no interaction
Methimazole	antihyperthyroid	13.9 mM	27.8 mM	no interaction
N-Methylanthranilic Acid	N/A	0.278 mM	3.77 mM	no interaction
Nonoxynol-9	spermatocide, contraceptive	0.119 M	N/A	no interaction
Orsellinic Acid, Ethyl Ester	N/A	1.29 mM	2.94 mM	no interaction
Paeonol	antibacterial	11.0 mM	21.9 mM	no interaction
Pectolinarin	N/A	0.546 mM	2.18 mM	no interaction
Phenacylamine Hydrochloride	N/A	15.9 mM	N/A	no interaction
Rabeprazole Sodium	gastric acid secretion inhibitor, cell growth factor	N/A	57.4 mM	no interaction
Succinylacetone	inhibitor of heme biosynthesis	0.246 mM	1.43 mM	no interaction
Sulfamethizole	antibacterial	14.4 mM	30.1 mM	no interaction
Tylosin Tartrate	antibacterial	2.41 mM	N/A	no interaction
Tyramine	adrenergic agonist	11.6 mM	23.1 mM	no interaction
Ursocholanic Acid	N/A	N/A	4.92 mM	no interaction
Usnic Acid	antibacterial	3.21 mM	3.95 mM	no interaction
Vincamine	vasodilator	1.81 mM	N/A	no interaction
Vindoline	CNS stimulant/depressant; antihyperglycaemic	2.94 mM	N/A	no interaction
