# Supplementary material for: Synergistic and antagonistic drug interactions in the treatment of systemic fungal infections
Source: eLife. 2020 May 5;9:e54160. doi: 10.7554/eLife.54160 (PMC7200157; doi:10.7554/eLife.54160)
Supplement: Supplementary file 3. [file elife-54160-supp3.xlsx]

## Sheet: Sheet1
Table S3.
Small Molecule	Bioactivity	MIC 90 (uM)
Bithionate Sodium	anthelmintic, antiseptic	3.7
Cloxyquin	antibacterial, antifungal	0.947
Cycloheximide	protein synthesis inhibitor	1.04
Fenbendazole	anthelmintic	0.0371
Hexachlorophene	antiinfective (topical)	760
Miconazole	antifungal (topical)	0.507
Oxiconazole Nitrate	antifungal	0.0349
Phenylmercuric Acetate	antifungal	0.0159
Pyrithione Zinc	antibacterial, antifungal, antiseborrheic	22.9
Sulconazole Nitrate	antifungal	0.206
Tacrolimus	immune suppressant, antifungal	6.44
Thimerosal	antiinfective, preservative	0.01
Thiram	antifungal	0.0384
