# Supplementary material for: Synergistic and antagonistic drug interactions in the treatment of systemic fungal infections
Source: eLife. 2020 May 5;9:e54160. doi: 10.7554/eLife.54160 (PMC7200157; doi:10.7554/eLife.54160)
Supplement: Supplementary file 4. — Strains and strain sources used in this study. [file elife-54160-supp4.xlsx]

## Sheet: Sheet1
Table S4.
Strain	Alternative Name/genotype	Species	Source
CM18		Cryptococcus neoformans
KN99		Cryptococcus neoformans
MUC 416-4		Cryptococcus neoformans	Chen et al., 2015
MUC 402-1		Cryptococcus neoformans	Chen et al., 2015
NRHc.5013.ENR		Cryptococcus neoformans	Chen et al., 2015
MUC 418-1		Cryptococcus neoformans	Chen et al., 2015
Ftc 555-1		Cryptococcus neoformans	Chen et al., 2015
NRHc.5027.ENR.CLIN1		Cryptococcus neoformans	Chen et al., 2015
Ftc 327-1		Cryptococcus neoformans	Chen et al., 2015
MUC 37-1		Cryptococcus neoformans	Chen et al., 2015
PMHC.1050.ENR.CLIN1		Cryptococcus neoformans	Chen et al., 2015
NRHc.5011.ENR		Cryptococcus neoformans	Chen et al., 2015
C. deuterogattii	R265	Cryptococcus deuterogattii	ATCC
C. auris 1	AR0383	Candida auris	CDC
C. auris 2	AR0384	Candida auris	CDC
C. albicans	SC5314	Candida albicans
C. glabrata	CBS138	Candida glabrata
cry neo 1		Cryptococcus neoformans	ARUP Laboratories
cry neo 2		Cryptococcus neoformans	ARUP Laboratories
cry neo 3		Cryptococcus neoformans	ARUP Laboratories
cry neo 4		Cryptococcus neoformans	ARUP Laboratories
cry neo 5		Cryptococcus neoformans	ARUP Laboratories
cry neo 7		Cryptococcus neoformans	ARUP Laboratories
cry neo 8		Cryptococcus neoformans	ARUP Laboratories
auris 1		Candida auris	ARUP Laboratories
auris 2		Candida auris	ARUP Laboratories
auris 3		Candida auris	ARUP Laboratories
cnag_00573KO	CM18, cnag_00573::NAT	Cryptococcus neoformans	Liu et al., 2008
cnag_03664KO	CM18, cnag_03664::NAT	Cryptococcus neoformans	Liu et al., 2008
cnag_03917KO	CM18, cnag_03917::NAT	Cryptococcus neoformans	Liu et al., 2008
