# Supplementary material for: Synergistic and antagonistic drug interactions in the treatment of systemic fungal infections
Source: eLife. 2020 May 5;9:e54160. doi: 10.7554/eLife.54160 (PMC7200157; doi:10.7554/eLife.54160)
Supplement: Supplementary file 5. — Minimum inhibitory concentration for 50% inhibition (MIC 50) and 90% inhibition (MIC 90) of small molecules that interacted with FLZ in various fungal species. N/A represents molecules that did not have an MIC. [file elife-54160-supp5.xlsx]

## Sheet: Sheet1
Table S5.
	CM18		KN99		MUC 416-4		MUC 402-1		NRHc.5013.ENR		MUC 418-1		Ftc 555-1		NRHc.5027.ENR.CLIN1		Ftc 327-1		MUC 37-1		PMHC.1050.ENR.CLIN1		NRHc.5011.ENR		C. deuterogattii		C. auris 1		C. auris 2		C. albicans		C. glabrata
	MIC50 (mM)	MIC90 (mM)	MIC50 (mM)	MIC90 (mM)	MIC50 (mM)	MIC90 (mM)	MIC50 (mM)	MIC90 (mM)	MIC50 (mM)	MIC90 (mM)	MIC50 (mM)	MIC90 (mM)	MIC50 (mM)	MIC90 (mM)	MIC50 (mM)	MIC90 (mM)	MIC50 (mM)	MIC90 (mM)	MIC50 (mM)	MIC90 (mM)	MIC50 (mM)	MIC90 (mM)	MIC50 (mM)	MIC90 (mM)	MIC50 (mM)	MIC90 (mM)	MIC50 (mM)	MIC90 (mM)	MIC50 (mM)	MIC90 (mM)	MIC50 (mM)	MIC90 (mM)	MIC50 (mM)	MIC90 (mM)
3-Amino-beta-Pinene	11.7	50.1	2.42	4.51	0.293	0.879	0.535	0.967	0.879	3.52	2.4	2.75	1.44	2.89	5.07	5.07	1.93	11.6	70.8	70.8	2.9	2.9	3.65	3.65	0.967	0.967	9.69	9.69	4.83	9.69	150	150	150	150
Benzalkonium Cl	0.0145	0.0145	0.0117	0.0233	0.00438	0.00874	0.00438	0.00874	0.00656	0.00656	0.0117	0.0117	0.0117	0.0233	0.0117	0.0175	0.0117	0.0233	0.00583	0.00583	0.0117	0.0117	0.0233	0.0233	0.00583	0.00583	0.0468	0.0468	0.0311	0.0623	0.00729	0.00729	0.00538	0.0108
Berbamine HCl	0.0635	0.0635	0.0402	0.0805	0.0805	0.0805	0.0805	0.0805	0.0805	0.0805	0.0402	0.0604	0.0805	0.0805	0.0805	0.0805	0.0805	0.0805	0.0825	0.0825	0.0402	0.0805	0.0402	0.0402	0.0805	0.0805	1.61	0.322	0.322	0.322	1.01	1.01	0.126	0.236
Bismuth Subsalicylate	1.49	N/A	0.0932	N/A	0.521	1.63	0.215	1.11	0.128	0.521	0.272	0.998	0.544	1.45	0.284	2.27	0.34	2.86	0.871	1.27	1.05	N/A	0.408	0.816	0.829	2.32	0.663	2.32	1.57	N/A	0.497	1.99	0.491	1.48
Clomipramine HCl	0.65	0.78	0.157	0.629	0.585	0.585	0.585	0.585	0.78	0.78	0.51	0.51	0.39	0.704	0.51	0.51	0.639	0.629	0.532	0.532	0.629	0.629	0.629	0.629	0.629	0.629	0.629	1.26	1.26	1.26	0.555	0.555	0.66	1.32
Dehydroepiandrosterone	1.5	12	1.43	11.4	0.88	8.67	3.29	8.14	2.12	9.01	3.22	11.4	4.1	6.65	3.82	10.2	1.95	11.4	3.9	10.2	3.42	9.3	8.86	N/A	0.894	1.79	4.7	N/A	2.86	11.4	11.4	11.4	0.888	2.13
Dicyclomine HCl	4.85	4.85	2.42	3.63	3.63	3.63	2.42	2.42	3.63	3.63	3.63	3.63	2.42	2.42	3.63	3.63	4.85	4.85	2.42	2.42	4.85	4.85	3.63	3.63	3.63	3.63	4.85	9.66	4.85	9.66	4.85	4.85	4.74	7.15
Estriol	24.8	24.8	12.4	18.6	17.3	17.3	19.2	19.2	14.7	26.4	23	23	21.5	21.5	24.8	N/A	N/A	N/A	24.8	N/A	24.8	N/A	6.8	26.4	24.8	24.8	15.5	18.6	6.98	24.8	24.8	24.8	6.13	12.2
Fluocinolone Acetonide	1.84	3.69	0.345	1.38	1.96	1.96	0.46	1.53	1.46	1.84	0.23	0.46	0.345	0.843	1.33	1.69	0.576	2.4	0.734	1.38	1.46	2.08	0.468	1.15	0.576	1.38	0.756	0.756	0.46	0.46	3.69	N/A	3.96	3.96
Sertraline HCl	0.209	0.313	0.214	0.214	0.209	0.209	0.209	0.209	0.209	0.209	0.182	0.182	0.182	0.182	0.182	0.182	0.107	0.214	0.2	0.2	0.214	0.214	0.214	0.214	0.214	0.214	0.214	0.429	0.214	0.429	0.858	0.858	1.41	N/A
Xylometazoline HCl	2.44	N/A	2.44	N/A	N/A	N/A	N/A	N/A	N/A	N/A	2.9	N/A	2.79	N/A	2	N/A	26.7	N/A	2.67	N/A	2.73	N/A	2.67	N/A	3.77	N/A	N/A	N/A	N/A	N/A	2.44	N/A	3.13	N/A
Ivermectin	1.91	1.91	0.158	1.07	0.317	0.952	1.07	N/A	0.218	N/A	0.326	1.13	2.17	N/A	0.19	2.08	0.358	1.39	0.715	N/A	0.221	N/A	0.156	0.207	0.149	N/A	0.198	N/A	0.119	N/A	1.54	N/A	0.296	0.592
Nafcillin Sodium	2.37	N/A	1.56	N/A	3.46	N/A	3.21	N/A	3.16	N/A	2.2	N/A	3.08	N/A	3.76	N/A	3.46	N/A	2.87	N/A	3.6	N/A	2.88	N/A	1.45	N/A	3.46	N/A	3.16	N/A	3.16	N/A	2.43	N/A
Fluconazole	0.025	0.1	0.0245	0.098	0.0184	0.049	0.0128	0.129	0.00614	0.0507	0.0152	0.0607	0.0117	0.0607	0.0251	0.0545	0.00796	0.0392	0.0526	0.111	0.024	0.0908	0.0218	0.0758	0.0408	0.0816	1.33	4	1.16	4	0.00625	0.0125	0.564	1.11
