# Supplementary material for: Synergistic and antagonistic drug interactions in the treatment of systemic fungal infections
Source: eLife. 2020 May 5;9:e54160. doi: 10.7554/eLife.54160 (PMC7200157; doi:10.7554/eLife.54160)
Supplement: Supplementary file 6. — Minimum inhibitory concentrations for 50% inhibition (MIC 50) and 90% inhibition (MIC 90) of FLZ resistant species. N/A represents molecules that did not have an MIC. [file elife-54160-supp6.xlsx]

## Sheet: Sheet1
Table S6.
	Cry neo 1		Cry neo 2		Cry neo 3		Cry neo 4		Cry neo 5		Cry neo 7		Cry neo 8		Auris 1		Auris 2		Auris 3
	MIC 50 (mM)	MIC 90 (mM)	MIC 50 (mM)	MIC 90 (mM)	MIC 50 (mM)	MIC 90 (mM)	MIC 50 (mM)	MIC 90 (mM)	MIC 50 (mM)	MIC 90 (mM)	MIC 50 (mM)	MIC 90 (mM)	MIC 50 (mM)	MIC 90 (mM)	MIC 50 (mM)	MIC 90 (mM)	MIC 50 (mM)	MIC 90 (mM)	MIC 50 (mM)	MIC 90 (mM)
Fluconazole	0.002	0.00606	0.0432	0.217	0.0476	0.114	0.0123	0.0262	0.0178	0.0423	0.0038	0.0305	0.00758	0.0218	0.343	1.31	1.27	n/a	1.29	n/a
Dicyclomine	2.42	2.42	2.42	2.42	2.01	2.01	2.42	2.42	2.42	2.42	2.42	2.42	1.21	2.42	4.85	9.66	4.85	9.66	4.84	9.66
Nafcillin	1.98	n/a	2.63	n/a	3.16	n/a	2.37	n/a	3.16	n/a	2.63	n/a	3.16	n/a	3.16	n/a	3.31	n/a	3.16	n/a
