# Supplementary material for: Synergistic and antagonistic drug interactions in the treatment of systemic fungal infections
Source: eLife. 2020 May 5;9:e54160. doi: 10.7554/eLife.54160 (PMC7200157; doi:10.7554/eLife.54160)
Supplement: Supplementary file 7. — Gene knockouts in KN99 resistant to dicyclomine at 1.65 mg/mL. [file elife-54160-supp7.xlsx]

## Sheet: Sheet1
Table S6.
CNAG	Gene
CNAG_00122	alpha-amylase
CNAG_00185	hypothetical protein
CNAG_00186	mitotic spindle organizing protein 1
CNAG_00651	ATP-binding cassette, subfamily D (ALD),peroxisomal long-chain fatty acid import protein
CNAG_00696	alpha-mannosidase
CNAG_00723	hypothetical protein
CNAG_00727	mitochondiral protein with role in iron accumulation
CNAG_00872	ATP-dependent DNA helicase
CNAG_00875	rab family protein
CNAG_01002	Hypothetical protein
CNAG_01192	Hypothetical protein
CNAG_01211	Hypothetical protein
CNAG_01212	Hypothetical protein
CNAG_01247	Hypothetical protein
CNAG_01248	Vacuole morphology and inheritance protein 14
CNAG_01249	Hypothetical protein
CNAG_01252	Thiosulfate/3-mercaptopyruvate sulfurtransferase
CNAG_01256	Hypothetical protein
CNAG_01585	Hypothetical protein
CNAG_01975	Helicase
CNAG_02016	hypothetical protein
CNAG_02057	URE6; urease accessory protein
CNAG_02058	Hypothetical protein
CNAG_02108	GTPase activating protein
CNAG_02409	LIV5; protein of unknown function
CNAG_02416	hypothetical protein
CNAG_02715	alpha-1,6-mannosyltransferase
CNAG_02733	monosccharide transporter
CNAG_03041	hypothetical protein
CNAG_03043	hypothetical protein, variant 1
CNAG_03056	hypothetical protein
CNAG_03460	phosphoglycerate dehydrogenase
CNAG_03523	solute carrier family25, member 38
CNAG_03582	RIM20; pH-response regulator protein palA/RIM20
CNAG_03770	hypothetical protein
CNAG_03828	aromatic amino acid aminotransferase I
CNAG_03831	hypothetical protein
CNAG_03871	phosphotyrosine protein phosphatase
CNAG_03905	hypothetical protein
CNAG_03908	wd-repeat protein
CNAG_03938	nonmating-type specific pheromone GPCR; CPR2
CNAG_03945	hypothetical protein
CNAG_03989	hypothetical protein
CNAG_04155	small nuclear ribonucleoprotein E
CNAG_04160	hypothetical protein, variant
CNAG_04199	hypothetical protein
CNAG_04203	hypothetical protein
CNAG_04311	charged multivesicular body protein 7
CNAG_04313	NADPH2 dehydrogenase
CNAG_04618	Hypothetical protein, variant
CNAG_05065	hypothetical protein
CNAG_05075	solute carrier family 20 (sodium-dependent phosphate transporter)
CNAG_05838	RGD1; rho GTPase activating protein homolog
CNAG_06225	hypothetical protein
